# MVPA does not reveal neural representations of hierarchical linguistic structure in MEG

Sophie Arana<sup>1,2\*</sup>, Jan-Mathijs Schoffelen<sup>2</sup>, Tom Mitchell<sup>3</sup>, Peter Hagoort<sup>1,2</sup>

<sup>1</sup>*Max Planck Institute for Psycholinguistics, Wundtlaan 1, 6525 XD Nijmegen, The Netherlands;* <sup>2</sup>*Donders Institute for Brain, Cognition and Behaviour, Kapittelweg 29, 6525 EN Nijmegen, The Netherlands;* <sup>3</sup>*Carnegie Mellon University, 5000 Forbes Avenue, Pittsburgh, USA*

---

## Abstract

During comprehension, the meaning extracted from serial language input can be described by hierarchical phrase structure. Whether our brains explicitly encode hierarchical structure during processing is, however, debated. In this study we recorded Magnetoencephalography (MEG) during reading of structurally ambiguous sentences to probe neural activity for representations of underlying phrase structure. 10 human subjects were presented with simple sentences, each containing a prepositional phrase that was ambiguous with respect to its attachment site. Disambiguation was possible based on semantic information. We applied multivariate pattern analyses (MVPA) to the MEG data using linear classifiers as well as representational similarity analysis to probe various effects of phrase structure building on the neural signal. Using MVPA techniques we successfully decoded both syntactic (part-of-speech) as well as semantic information from the brain signal. Importantly, however, we did not find any patterns in the neural signal that differentiate between different hierarchical structures. Nor did we find neural traces of syntactic or semantic reactivation following disambiguating sentence material. These null findings suggest that subjects may not have processed the sentences with respect to their underlying phrase structure. We discuss methodological limits of our analysis as well as cognitive theories of "shallow processing", i.e. in how far rich semantic information can prevent thorough syntactic analysis during processing.

---

\*corresponding author: [arana.sophie@gmail.com](mailto:arana.sophie@gmail.com)

*Keywords:* Syntax, Semantics, Multivariate, Decoding, Representational Similarity Analysis

---

## 1. Introduction

Although we perceive language mainly in a sequential fashion (e.g. by reading word by word) we need to take into account information beyond the sequential order to fully comprehend its meaning. For example, in a sentence like “The woman who owns two dogs chases the cat” we understand that the woman is the one chasing, not the dog. This knowledge can be expressed through hierarchical, structured relationships between the words. Specifically, words can be grouped into constituents (e.g. “Who owns the dog” and “The woman chases the cat”) and constituents in turn can be nested into higher-level phrases, as shown in 1. The resulting nested phrase structure then fully describes the important conceptual units and their relationships with each other. Thus, hierarchical phrase structure also directly relates to thematic role assignment (the woman being assigned the agent role of the chasing action).

1. ((The woman (who owns the dogs)) chases the cat)

This type of structured meaning is to a large degree determined by syntax. As seen above, syntactic aspects like word order, function words (here: the relative pronoun ‘who’) as well as morpho-syntactic features such as number agreement provide cues with respect to the word-phrase relationships. Semantic information (e.g. animacy) or even just semantic association itself can also guide how structure should be assigned. In the above example, syntactic cues, however, override simple semantic association between the lemmas

23 “dog” and “chase”. In theory, hierarchical descriptions can be applied to all  
24 linguistic levels of the stimulus during language processing (e.g. syntactic,  
25 semantic and phonological structure) (Jackendoff [2003]).

26 How hierarchical phrase structure building is neurally encoded as we pro-  
27 cess language is still an open question. In fact, some have even disputed its  
28 neural and psychological reality during language use altogether (Frank et al.  
29 [2012]). Some recent evidence for the reality of hierarchical phrase struc-  
30 ture building comes from neuroimaging studies that assess its consequences  
31 on memory load (Nelson et al. [2017]; Pallier et al. [2011]) and production  
32 (Giglio et al. (in prep)). For example, Pallier et al. varied linguistic con-  
33 stituent size while keeping overall sentence length constant and identified  
34 brain regions whose activity parametrically increased with the size of the con-  
35 stituents (larger constituents thought to result in higher memory demands  
36 and stronger neural activity) (Pallier et al. [2011]). Following a similar ap-  
37 proach, Nelson et al. modelled neural activity according to a hierarchical  
38 phrase-structure model and found it to explain more variance when fitted to  
39 intracranial data as compared to alternative models that were based on tran-  
40 sition probabilities only (Nelson et al. [2017]). This is in line with behavioral  
41 evidence, demonstrating that humans prefer a hierarchical interpretation over  
42 a linear one, for example when interpreting ambiguous noun phrases, such  
43 as “second blue ball” (Coopmans et al. [2021]). At the same time, there  
44 are several studies demonstrating that reading times can often be sufficiently  
45 accounted for by sequential-structure models (Frank and Bod [2011]), cast-  
46 ing doubt on how pervasive the construction of hierarchical structure during  
47 language processing really is.

48 In early psycholinguistic experiments, hierarchical structure building has  
49 been measured through reading time behaviour for structurally ambiguous  
50 sentences. One example for such ambiguity is prepositional phrase attach-  
51 ment. Prepositional phrases (PPs) in sentence-final position (examples 2 &  
52 3) are structurally ambiguous with respect to their attachment to the main  
53 clause. For example, a prepositional phrase can be interpreted as noun-  
54 attached as in sentence 2 (a cop with the revolver) or as verb-attached as  
55 in sentence 3, in which case it modifies the verb (seeing with binoculars).  
56 In contrast to other structurally ambiguous stimuli such as garden-path sen-  
57 tences, different prepositional phrase attachments do not involve different  
58 word forms or function words. Hence, any disambiguation cannot depend  
59 on syntactic information. Still, human readers are able to assign a unique  
60 meaning to such structurally ambiguous sentences with ease, relying on world  
61 knowledge to connect the semantic information provided by both the prepo-  
62 sitional phrase itself with its preceding context in the most plausible way  
63 (e.g. revolvers are likely to be carried by cops and binoculars are likely in-  
64 struments for seeing.). Note that sentence-final prepositional phrases are not  
65 rare or non-canonical. For example, in the structurally annotated TIGER  
66 corpus (see methods for details) we found about 43% of all prepositional  
67 phrases to be structurally ambiguous.

- 68 2. The spy saw the cop with the revolver.
- 69 3. The spy saw the cop with the binoculars.

70 Originally, structurally ambiguous sentences had been shown to lead to  
71 prolonged reading times at the disambiguating word (e.g. noun-attached PPs  
72 being read more slowly than verb-attached PPs). Based on these findings,

73 Frazier had proposed sentence comprehension to rely on an initial structural  
74 interpretation of the sentence driven by syntactic cues only and following  
75 certain rules such as the minimal attachment principle. According to the  
76 minimal attachment principle, the preferred structure is always the more  
77 shallow one (i.e. the one resulting in a minimal amount of nested dependen-  
78 cies). Therefore, according to minimal attachment the verb-attached reading  
79 of the PP is preferred already when encountering the preposition. In the case  
80 of a noun-attached phrase, subsequent words thus leads to the need for post-  
81 hoc structural reanalysis and as a consequence longer reading times (Rayner  
82 et al. [1983]; Frazier and Rayner [1982]). Frazier's early theory was quickly  
83 overturned in favour of a parallel (or cascading) processing model (McClelland  
84 and Kawamoto [1986]; Van Den Brink and Hagoort [2004]; Pulvermüller et al.  
85 [2009]; Hagoort [2017]) by several studies demonstrating the fast integra-  
86 tion of non-syntactic cues early during online processing (Spivey-Knowlton  
87 and Sedivy [1995]), (Altmann and Steedman [1988]), (Taraban and McClel-  
88 land [1988]), (Traxler and Tooley [2007]), (Mohamed and Clifton [2011]). For  
89 the processing of ambiguous PPs, it has been shown that facilitated pro-  
90 cessing of verb-attachments is modulated by referential information imposed  
91 by the context (Altmann and Steedman [1988]) as well as semantic con-  
92 tent of the preceding verb (Spivey-Knowlton and Sedivy [1995]). More con-  
93 cretely, Spivey-Knowlton et al. have shown that action verbs bias expecta-  
94 tions towards verb-attachment while verbs referring to mental states (e.g. the  
95 spy hoped for ..) or perception can bias towards noun-attachment (Spivey-  
96 Knowlton and Sedivy [1995]). The authors explain this by different types of  
97 verbs being associated with certain thematic roles to different degrees (e.g. ac-

98 tion verbs occur with an instrument more often than perception verbs). As a  
99 consequence, reading time differences that have originally been interpreted to  
100 be a direct consequence of hierarchical structure building, could be reflecting  
101 predictions about upcoming semantic content instead.

102 In a more recent study, Boudewyn and colleagues argued against this  
103 alternative hypothesis of PP reading differences being caused by varying se-  
104 mantic predictions. They investigated the neural activity evoked by verb-  
105 and noun-attached prepositional phrases through event-related potentials  
106 (ERPs). In addition to the classically observed delay in reading times, their  
107 noun-attached stimuli evoked larger positive potentials around 600 ms (P600)  
108 (as compared to their verb-attached versions). Importantly, they showed that  
109 the amplitude of this P600 was reduced when noun-attached targets followed  
110 noun-attached primes (Boudewyn et al. [2014]). Boudewyn and colleagues  
111 are not the first ones to report structural priming effects. In fact, syntactic  
112 priming has been reported already some 35 years ago, showing that speak-  
113 ers are more likely to repeat a given syntactic structure in their utterances  
114 than to switch between two conceptually equal alternatives (Bock [1986]).  
115 To evoke priming of hierarchical structure, researchers explicitly vary lexical  
116 information while keeping syntactic structure stable. More recent investiga-  
117 tions indicate, however, that event structure (i.e. thematic roles) as well as  
118 lexical information can to a large degree account for many priming results  
119 and hence priming solely on the structural level has not been definitively  
120 proven yet (Ziegler et al. [2019]). Other confounding factors that can evoke  
121 priming and are often contrasted along side syntactic structures are informa-  
122 tion structure, syntax-animacy mapping and rhythmic priming. Boudewyn

123 et al. argue for their priming effect to be structural in nature based on the  
124 timing of their observed ERP effect. Differences in ERPs have been gener-  
125 ally interpreted as neural markers for a difference in processing (for example  
126 more or less engagement of the underlying neuronal population). The P600,  
127 specifically, has been reported most often in the context of syntactic viola-  
128 tions or anomalies. Hence, the authors interpret this priming effect to reflect  
129 facilitated structural processing of an originally dis-preferred structure. Still,  
130 ERP effects need to be interpreted with caution, since their relationship to  
131 underlying cognitive mechanisms is unclear. For example, recent computa-  
132 tional cognitive models of language processing illustrate that ERP markers  
133 can be modelled as reflecting general update or error signals, without restrict-  
134 ing them to any specific linguistic operation (Rabovsky et al. [2018]),(Fitz  
135 and Chang [2018]).

136 In addition, most ERP research so far reflects only a one-sided mea-  
137 sure of the neural code. Namely, the dominant analysis approach has been  
138 to treat ERPs as unidimensional point-estimates. Computing signal ampli-  
139 tude separately for a given channel and time point and averaged over trials,  
140 subjects and eventually space and time. As a consequence, such analyses  
141 can only detect univariate effects and are highly sensitive to subject-level  
142 variability. With the recent increase in computing power and developments  
143 of multi-variate pattern analysis (MVPA) we can now capture richer mul-  
144 tidimensional information encoded across several channels or source points  
145 (Guggenmos et al. [2018]; Norman et al. [2006]). Through MVPA, researchers  
146 have been able to uncover additional task-relevant brain regions (Jimura and  
147 Poldrack [2012]) and characterise the specific computations needed for am-

148 biguity resolution in more detail (Tyler et al. [2013]). Furthermore, MVPA  
149 has the potential to be sensitive to distributed neural representations of the  
150 content whereas univariate methods have been thought to be most sensi-  
151 tive to the engagement of basic processing operations (Raizada et al. [2010],  
152 Mur et al. [2009], Okada et al. [2010]). Although not every effect revealed  
153 through MVPA is necessarily indicative of an underlying distributed neural  
154 code (Davis et al. [2014]), the technique has nonetheless been successfully  
155 used to reveal higher-level structure in the neural signal for domains other  
156 than language (e.g. for hierarchical motor sequences Yokoi and Diedrichsen  
157 [2019]). MVPA might hence be better suited to target hierarchical structure  
158 building during language processing than previous univariate methods.

159 In this study, we revisit processing of structurally ambiguous PPs with  
160 the approach of MVPA in order to more directly tap into representations  
161 of hierarchical structure underlying language comprehension. In contrast  
162 to early psycholinguistic approaches we do not assume that noun or verb-  
163 attached prepositional phrases are processed differently from each other in  
164 the sense of one structure being more preferred over another. Rather we ask,  
165 whether it is possible to find a neural correlate of the hierarchical phrase  
166 structure of a sentence (i.e. neural patterns that distinguish between verb-  
167 and noun-attached PPs), given completely ambiguous syntactic cues.



## 168 **2. Methods**

### 169 *2.1. Stimulus Material*

#### 170 *2.1.1. Corpus Analysis*

171 All stimuli were created in German. Since most of the previous liter-  
172 ature had looked at prepositional phrases in English, we first conducted a  
173 corpus analysis to determine which German preposition will most likely be  
174 ambiguous with respect to structural attachment of the prepositional phrase.

175 For our corpus analysis we used the TIGER corpus, a manually annotated  
176 corpus of 40,000 German sentences (Brants et al. [2004]). The corpus is  
177 available at [www.ims.uni-stuttgart.de](http://www.ims.uni-stuttgart.de) in both xml as well as conll09 format.  
178 We used the xml version for queries with the TIGERSearch Tool as well  
179 as the conll09 version for quick extraction of frequency statistics using the  
180 bash shell command `awk`. We extracted separate frequency information per  
181 preposition and structure (noun-attached and verb-attached prepositional  
182 phrases) through the TIGERSearch software (see Appendix for details on  
183 the TIGERSearch queries).

#### 184 *2.1.2. Stimuli*

185 Based on the corpus search, we selected the preposition “mit” (engl.:  
186 with) because it occurs with high frequency (Figure 1) and equally often  
187 within both noun- and verb attached phrases (Figure 2). We created a stim-  
188 ulus set of 100 sentence pairs in German. All sentences consisted of nine  
189 words each, a subject-verb-object structure in the main clause followed by a  
190 four word prepositional phrase including the preposition and a determiner-  
191 adjective-noun phrase. This sentence structure was syntactically ambiguous

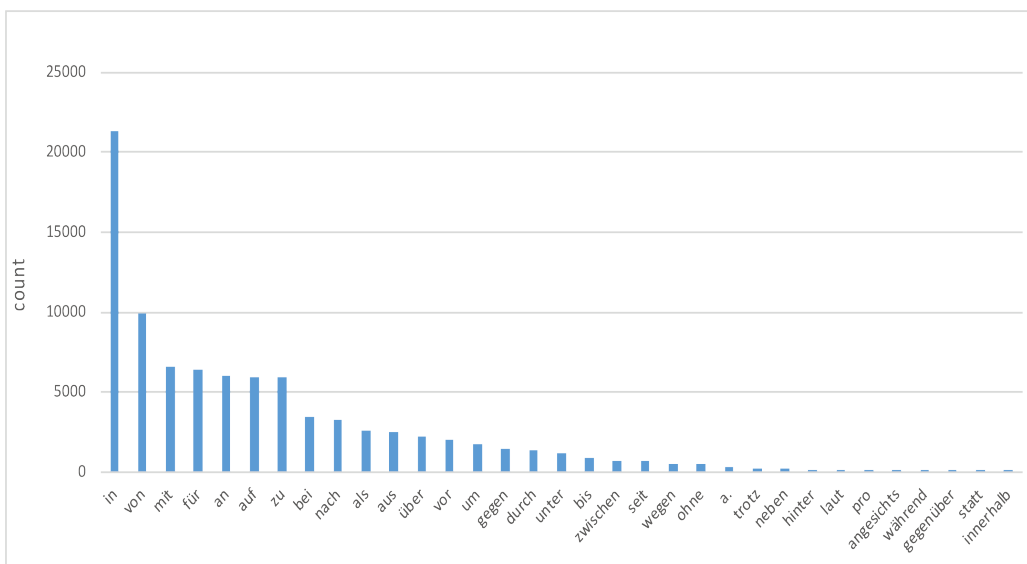

Figure 1: **Tiger corpus frequencies per preposition.**

Total number of occurrence for the 33 most frequent prepositions based on the German "Tiger" corpus.

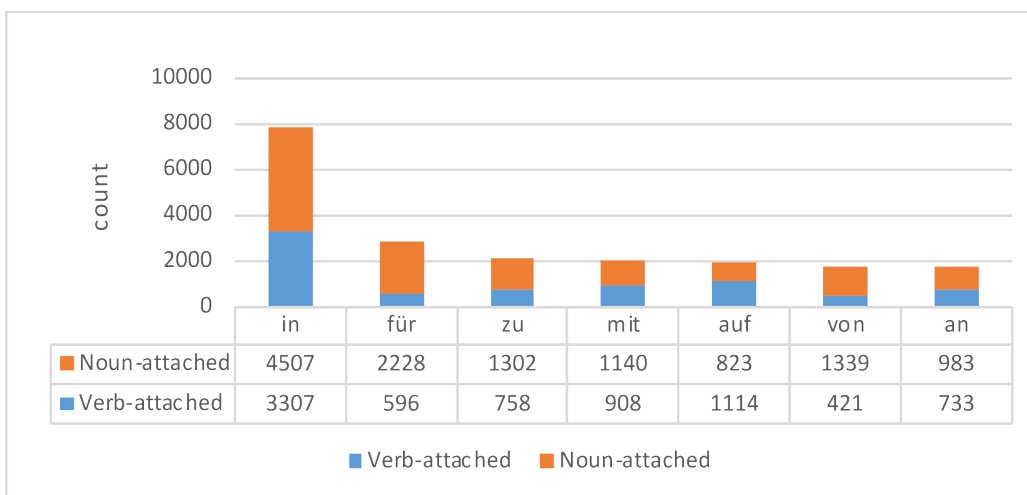

Figure 2: **Tiger corpus attachment proportions per preposition.**

Frequency of verb- and noun-attached phrase constructions (not restricted to sentence final PP) for the seven most frequent prepositions in the corpus.

192 with respect to the attachment site of the prepositional phrase. Within a  
193 given pair, the same prepositional phrase was presented while the sentence  
194 context leading up to it was manipulated. Based on the combined semantic  
195 information of the sentence context and the prepositional phrase, the in-  
196 terpretation of the most plausible attachment could be disambiguated. To  
197 steer the preferred attachment interpretation, we manipulated the sentence  
198 context in two ways. In half of the sentence pairs we varied the main verb,  
199 we call this the verb condition (examples 4 & 5). Sentence pairs in the verb  
200 condition were constructed such that the noun in object position could poten-  
201 tially be modified by the PP but did not have a particularly strong semantic  
202 association with the PP internal noun. By presenting these sentences with a  
203 verb for which modification through the PP internal noun was either allowed  
204 or forbidden (or at least unlikely), a verb-attached interpretation could either  
205 be encouraged or prevented respectively. In the other half of the sentence  
206 pairs, we exchanged agent and patient identity across the two sentences. In  
207 the following, I will refer to this as the role condition (examples 6 & 7). For  
208 sentence pairs in the role condition the two nouns preceding the PP had a  
209 varying degree of semantic association to the PP internal noun while the verb  
210 was held stable with a mild semantic association to the PP internal noun and  
211 optional modification through a PP. This lead to a noun-attached interpre-  
212 tation if the more strongly associated noun occurred in object position (the  
213 noun immediately preceding the PP) but to a verb-attached interpretation  
214 when it occurred in subject position. In both the role and the verb con-  
215 dition, each verb was repeated exactly two times across all sentences. We  
216 explore difference between verb and role conditions in the behavioral data

217 but collapse across both conditions when analysing the neural data. Finally  
218 100 filler sentences with varying syntactic structure were created.

219 **Verb condition**

220 4. Die Partei besitzt eine Untergruppe mit einigen Argumenten

221 *engl.: The party has a subgroup with questionable arguments.*

222 5. Die Partei überzeugt eine Untergruppe mit einigen Argumenten

223 *engl.: The party convinces a subgroup with questionable arguments.*

224 **Role condition**

225 6. Das Kind verängstigt das Insekt mit dem giftigen Stachel

226 *engl: the child frightens the insect with the poisonous sting*

227 7. Das Insekt verängstigt das Kind mit dem giftigen Stachel

228 *engl: the insect frightens the child with the poisonous sting*

229 *2.1.3. Pre-test*

230 For the majority of the sentences, the overall semantics licensed both PP  
231 attachments, even if they were constructed such that one attachment should  
232 be perceived as more plausible. To verify that our manipulation evoked  
233 the intended sentence interpretation we pre-tested all stimuli via an online  
234 questionnaire, created with the survey tool Limesurvey (Carsten Schmitz  
235 [2012]). During this online questionnaire, 62 native German speakers with a  
236 mean age of 25 (range 19-33) judged for each stimulus-sentence whether it  
237 contained a verb- or noun-attached prepositional phrase and how plausible  
238 they found the sentence (on a scale from 1 to 5). All subjects gave informed  
239 consent prior to filling in the survey and received financial reimbursement.

240 Based on the answers we selected 200 sentences out of a larger set of 469  
241 sentences according to criteria described in detail below (see Table 2 and 3 in  
242 Appendix for the final selection of sentences as used in the MEG experiment).

243 First, subjects were instructed about the difference in attachments. This  
244 was done using unambiguous stimuli and a non-formal intuitive explanation  
245 like “In the verb-attached case the prepositional phrase says something about  
246 the verb”. Subjects were then asked to formulate the rule to distinguish the  
247 two attachments in their own words and were presented with four unam-  
248 biguous practice items. Finally, they would read 80 to 100 sentences one by  
249 one and for each sentence decide between verb- or noun attachment. Ten  
250 seconds after a sentence appeared on screen a pop-up window encouraged  
251 subjects to answer faster. This time limit was chosen to force subjects to  
252 answer intuitively. However, many subjects would need more time on certain  
253 trials. After selecting their answer they could continue with the next item  
254 at their own pace. Half way through the questionnaire subjects were encour-  
255 aged to take a longer break if needed. The stimulus list was split up into  
256 three parts to keep the duration of each survey to about 30 minutes. Each  
257 subject saw one of the possible lists in a pseudo-random order, so that sen-  
258 tences from the same pair were at least four items apart. Three subjects were  
259 excluded either based on poor performance on the practice items (less than  
260 three correct), because their average reaction time diverged extremely from  
261 the average (greater than 1.5 times the interquartile range) or because they  
262 had less than 60% correct answers to those sentences that were semantically  
263 completely unambiguous.

264 The survey results were analyzed using R version 3.6.3 and the lme4 pack-

265 age for linear mixed-effects models (Bates et al. [2015]). Pairs of sentences  
266 were selected if both received at least 74% of answers consistent with the  
267 intended attachment. With more than 74% of answers being consistent with  
268 the intended attachment we can exclude the alternative hypothesis of random  
269 behavior at an alpha level of 0.05 given a binomial distribution and 20 data  
270 samples per item. The selection was made so that every verb was repeated  
271 exactly two times and there were equal amounts of sentences in both verb  
272 and role condition.

273 On pre-test results for the final selection of sentences, we used a gener-  
274 alised linear mixed effects model (GLMM) with a logit link function fit by  
275 maximum likelihood to examine the relationship between accuracy (i.e. per-  
276 centage of answers in line with our expectations), reaction time, plausibility  
277 ratings (on a scale of 1 to 5), context manipulation (verb condition or role con-  
278 dition) and attachment type (verb- or noun-attached). A mixed logit model  
279 appropriately accounts for binomial response variables (Jaeger [2008]), in our  
280 case hits or misses (correctly identifying an attachment according to intended  
281 sentence meaning or not). The model thus allowed us to test whether there  
282 were systematic differences in processing noun- or verb-attached sentences,  
283 as well as systematic differences between our different context manipulation  
284 conditions while controlling for between-subject variance. We specified ac-  
285 curacy (hit or miss) as the dependent variable and reaction time, plausibility  
286 rating, and context condition as fixed effects. Additionally, the model in-  
287 cluded random-effect terms for items (intercept only) and subject (intercept  
288 and slope). The model was fully saturated with all two-way interaction ef-  
289 fects.

290 GLMM results indicate a significant effect of attachment type and plau-  
291 sibility, with factor level contrasts revealing that subjects were more often  
292 correct for noun-attached items (see Figure 3) and high plausibility ratings  
293 led to high accuracy. There was a significant Attachment type x Plausibility  
294 interaction. Factor level contrasts revealed that the effect of high plausibil-  
295 ity leading to high accuracy was stronger for verb-attached sentences than  
296 noun-attached sentences (see Figure 4). The context manipulation effect was  
297 not significant and only the interaction Context Manipulation x Attachment  
298 was significant, indicating that only for noun-attached sentences were items  
299 more often correctly interpreted in the verb condition compared to the role  
300 condition (see Figure 3). Finally, the interaction of Reaction Time x Plau-  
301 sibility was significant. As illustrated in Figure 5, high plausibility ratings  
302 only lead to higher accuracy if reaction times were fast. In summary, whether  
303 sentences were constructed to fit the verb or the role condition did not lead to  
304 large differences in accuracies, although sentences in the verb condition were  
305 slightly biased towards a noun-attached interpretation. Most of the items  
306 used in the experiment received a plausibility rating of higher than 3 on av-  
307 erage with only four items with an average rating below 3 and verb-attached  
308 sentences receiving on average slightly higher plausibility ratings.

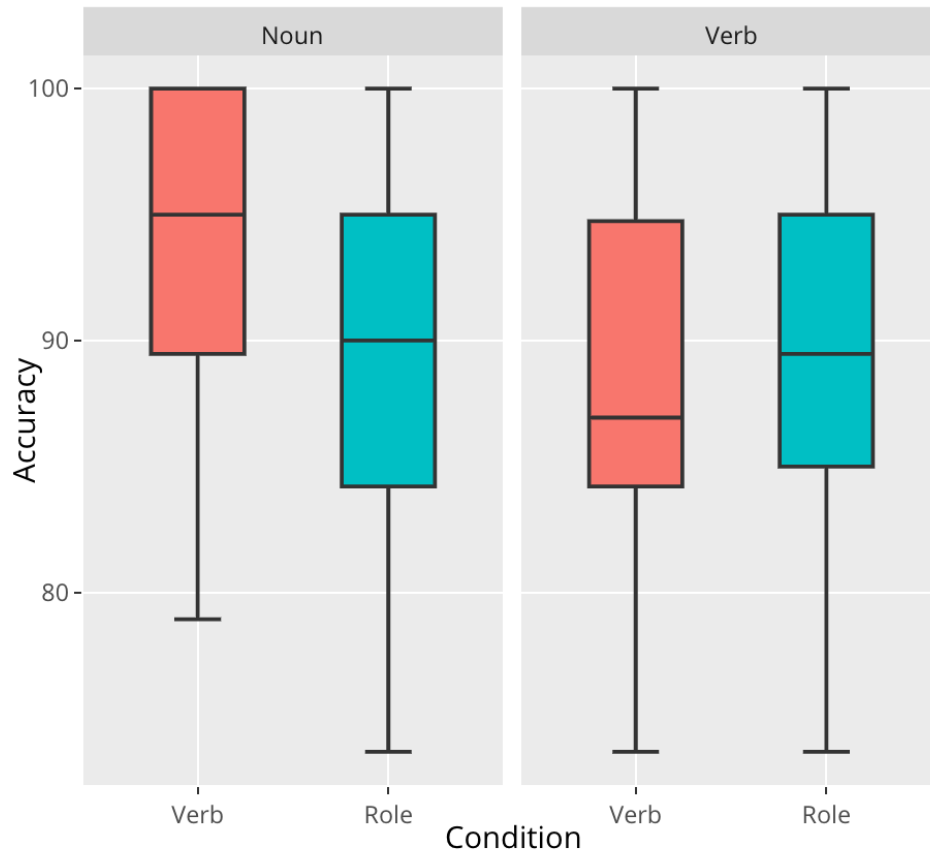

Figure 3: **Pre-test proportion of correct responses averaged across all subjects.**

Accuracies are plotted separately for verb condition (red), role condition (blue) and for noun-attached sentences (leftmost graphs) and verb-attached sentences (rightmost graphs).



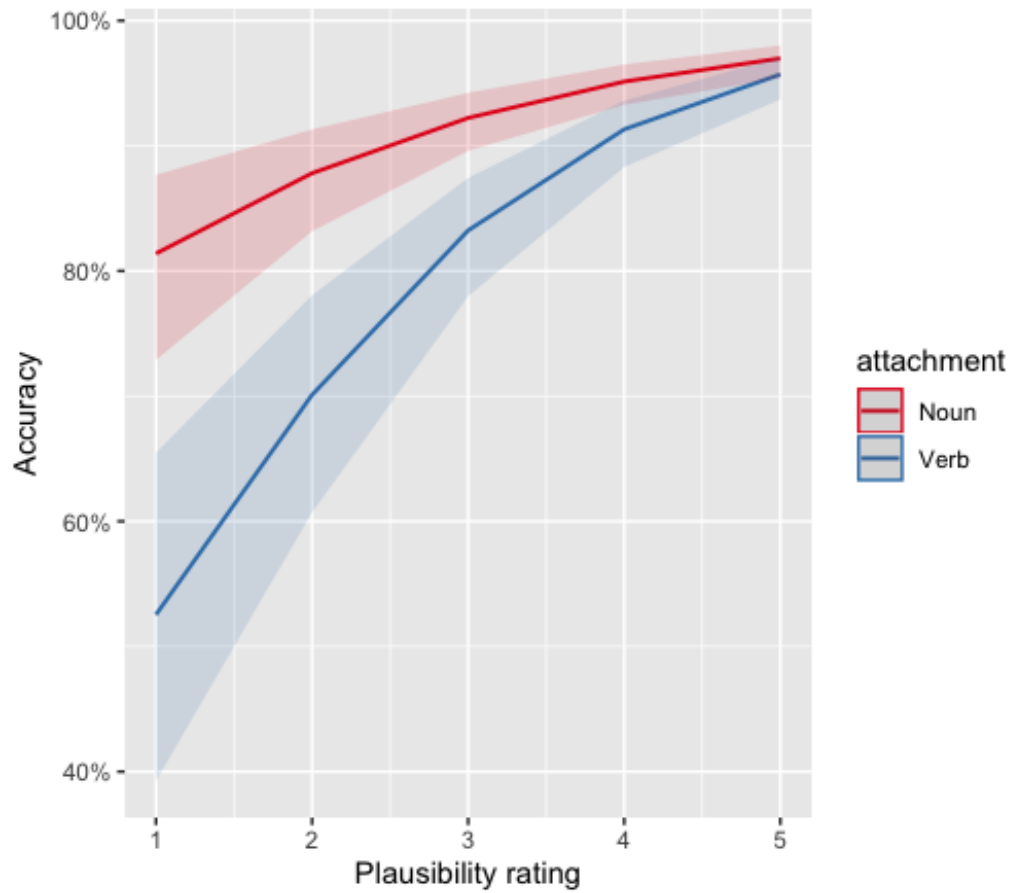

Figure 4: **Interaction between plausibility ratings and attachment type.**

Mean Accuracy per plausibility rating is plotted for noun-attached (red) and verb-attached (blue) items.

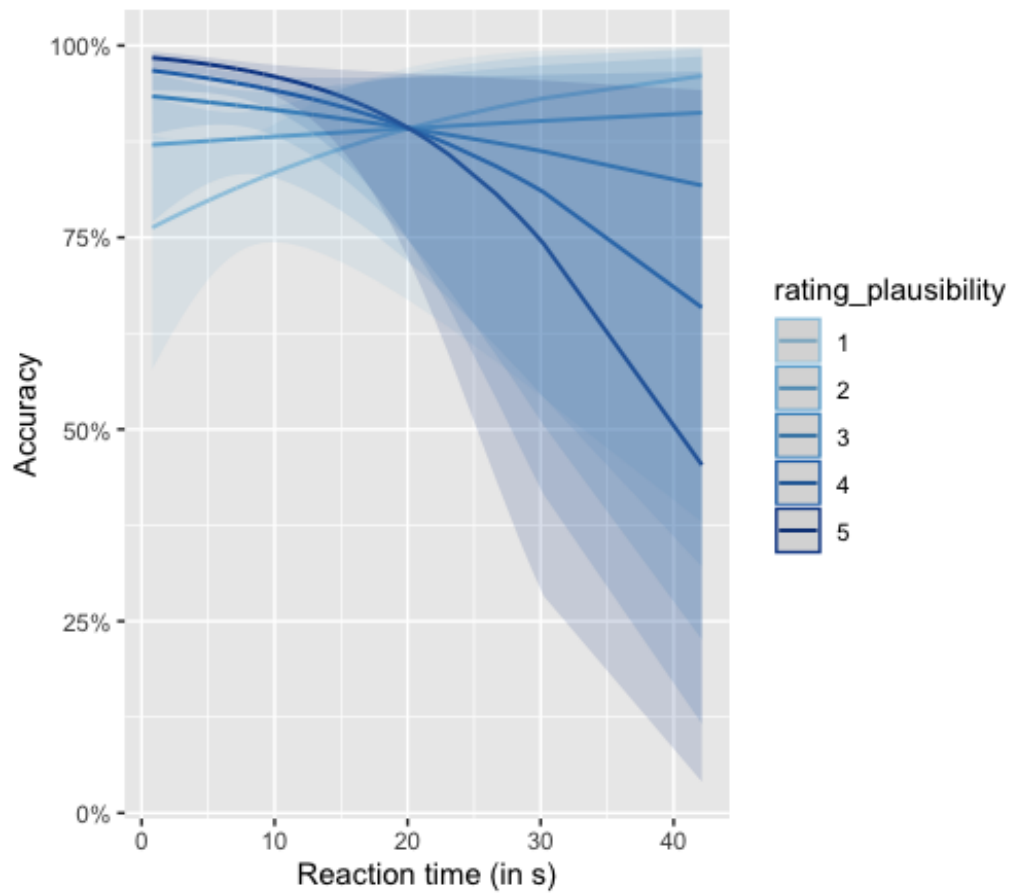

Figure 5: **Interaction between reaction times and plausibility ratings.**

Mean Accuracy per reaction time is plotted for different plausibility ratings. The higher the plausibility the darker the color.

309 *2.2. Experiment*

310 10 Native German speakers (mean age = 22 years, 3 male) were seated in  
311 a magnetically shielded room and read sentences word-by-word while their  
312 neural activity was recorded using Magnetoencephalography (MEG). All sub-  
313 jects gave informed consent prior to filling in the survey and received financial  
314 reimbursement or credits. All stimuli were presented using the Presentation  
315 software (Version 16.0, Neurobehavioral Systems, Inc). Sentences were pre-  
316 sented in pseudo-random order and word-by-word in four blocks with self-  
317 paced pauses in between blocks. In 25% of all trials a comprehension question  
318 would follow the sentence. Comprehension questions were either directed at  
319 identifying the agent or patient of the sentence (“Who has the bucket” or  
320 “Who is being carried”) or they would target the semantic dependency of  
321 the prepositional attachment (example question following (1): “Who has the  
322 questionable arguments”). The question was presented together with two  
323 answers, one on the left and one on the right side of the screen. Subjects  
324 indicated which answer they chose by pressing a button with their index  
325 finger corresponding to the position of the answer on the screen. The com-  
326 prehension questions were meant to ensure that subjects were engaged and  
327 attentive during the task and that they fully parsed the presented sentences  
328 on both a semantic as well as structural level. Prior to the main experiment  
329 subjects received four practice trials to familiarise themselves with the pace  
330 of the presentation. Words were presented sequentially on a back-projection  
331 screen, placed in front of them (vertical refresh rate of 60 Hz) at the centre  
332 of the screen, in a white font, on a black background. Each word was sepa-  
333 rated by an empty screen for 200 ms and the final word of each sentence was

334 followed by a 2000 ms blank screen. Duration of each word on screen was  
335 392 ms on average and varied with word length with a minimum duration  
336 of 300 ms and maximum duration of 500 ms (formula:  $300 \text{ ms} + \text{number of}$   
337  $\text{letters} * 1000/60$ ). The inter-sentence interval was jittered between 500 and  
338 1000 ms. Within two weeks after the MEG experiment, subjects filled out a  
339 questionnaire rating each stimulus sentence as either noun- or verb attached  
340 and as plausible on a scale from 1 to 5. This questionnaire was the same as  
341 the one used for the pre-test but contained only those stimuli that had been  
342 used during the MEG experiment.

343 MEG data were collected with a 275 axial gradiometer system (CTF). The  
344 signals were analog low-pass-filtered at 300 Hz and digitized at a sampling fre-  
345 quency of 1,200 Hz. The position of the subject's head was registered to the  
346 MEG-sensor array using three coils attached to the subject's head (nasion,  
347 and left and right ear canals). Throughout the measurement, the head posi-  
348 tion was continuously monitored using custom software (Stolk et al. [2013]).  
349 During breaks the subject was instructed to reposition to the original posi-  
350 tion if needed. Subjects were able to maintain a head position within 5 mm  
351 of their original position. Three bipolar Ag/AgCl electrode pairs were used  
352 to measure the horizontal and vertical electrooculogram and the electrocar-  
353 diogram. In addition to the brain signal, we acquired T1-weighted magnetic  
354 resonance (MR) images of each subject's brain using 3 Tesla Siemens Pris-  
355 maFit and Skyra scanners. All scans covered the entire brain and had a voxel  
356 size of  $1 \times 1 \times 1 \text{ mm}^3$ . Finally, we recorded the subject's head shape with the  
357 Polhemus for better co-registration of MEG and anatomical scans.

358 *2.3. Preprocessing & Source reconstruction*

359 Data were pre-processed using the Fieldtrip toolbox in MATLAB (Oost-  
360 enveld et al. [2011]). For the decoding analysis the Donders machine learning  
361 toolbox (Van Gerven et al. [2013]) was used in combination with custom-  
362 made MATLAB scripts. The data were segmented into epochs around word  
363 onset with a 200 ms pre-stimulus period. To detect muscle artifacts, data  
364 was bandpass filtered between 110 Hz and 140 Hz and the trials with large  
365 variance were excluded upon inspection (less than 4% of all critical trials).  
366 Data was filtered between 0.1 Hz and 40 Hz. Independent component analy-  
367 sis (ICA) was used to remove artifacts stemming from the cardiac signal and  
368 eye blinks. For each subject, the time course of the independent components  
369 was correlated with the horizontal and vertical EOG signals as well as the  
370 ECG signal to identify and subsequently remove contaminating components.

371 We used linearly constrained minimum variance beamforming (LCMV)  
372 (Van Veen et al. [1997]) to reconstruct activity onto a parcellated cortically  
373 constrained source model. For this, we computed the covariance matrix  
374 between all MEG-sensor pairs as the average covariance matrix across the  
375 cleaned single trial covariance estimates. This covariance matrix was used  
376 in combination with the forward model, defined on a set of 7842 source lo-  
377 cations per hemisphere on the subject-specific reconstruction of the cortical  
378 sheet to generate a set of spatial filters, one filter per dipole location. In-  
379 dividual cortical sheets were generated with the Freesurfer package (Dale  
380 et al. [1999], version 5.1) ([surfer.nmr.mgh.harvard.edu](http://surfer.nmr.mgh.harvard.edu)). The forward model  
381 was computed using FieldTrip's singleshell method (Nolte [2003]), where the  
382 required brain/skull boundary was obtained from the subject-specific T1-

383 weighted anatomical images. We further reduced the dimensionality of the  
384 data, by grouping source points into 374 parcels, using a refined version of  
385 the Conte69 atlas. These parcels were used as searchlights in the subsequent  
386 analyses.

## 387 *2.4. Multivariate decoding analysis*

### 388 *2.4.1. Gaussian Naive Bayes*

389 We trained a Gaussian Naïve Bayes classifier (GNB) (Mitchell [1997]) to  
390 identify cognitive states associated with underlying sentence structure from  
391 the pattern of brain activity evoked by reading the final word of a prepo-  
392 sitional phrase. The GNB is a generative classifier that models the condi-  
393 tional probability  $P(x_j|Y_i)$  of signal amplitude  $x$  (at a given sensor/voxel  $j$ )  
394 given that the stimulus is of a class  $Y_i$  (noun- or verb-attached prepositional  
395 phrase) using a univariate Gaussian and assuming class conditional indepen-  
396 dence. The mean and variance of this distribution is estimated on a subset  
397 of the trials (training set). The remaining data (test set) is then classified as  
398 the class  $Y_i$  whose posterior probability  $P(Y_i|x)$  is maximal among all classes.  
399 The corresponding classification rule is:

$$400 \quad Y \leftarrow \underset{y_j}{\operatorname{argmax}} P(Y = y_j) \prod_j P(X_j|Y = y_j)$$

401 Classification results were evaluated using 20-fold cross-validation, so that  
402 accuracy was always based on test data that were disjoint from the training  
403 set. 20 folds were chosen for a good balance between amount of training data  
404 per fold and computational speed. Accuracy was estimated as the percentage  
405 of correctly classified trials across all folds. Classifiers were trained using a  
406 sliding time-window approach, where for each time-point, MEG data from

407 all sensors and all time-points  $\pm 50$ ms were concatenated into a single vector  
408 (length = vertices x time-points). We also trained the same classifier on  
409 source-reconstructed data using a spatial searchlight approach in addition to  
410 the sliding time-window. The searchlight procedure followed the parcellation  
411 of the cortical sheet. For each parcel and time-point a classifier was trained  
412 on source data of all vertices within that parcel, while concatenating across  
413 all time-points within a sliding window of width 100 ms.

414 All parameters chosen for the classification analysis were manually op-  
415 timised based on accuracy of an orthogonal classification task, namely to  
416 distinguish neural patterns evoked by either reading the main verb or the sec-  
417 ond noun (object noun) of the sentences. Decoding which of these different  
418 word classes was being presented robustly resulted in accuracies significantly  
419 higher than chance performance. Within our stimulus design, word class  
420 was confounded with ordinal word position in the sentences. Therefore, we  
421 conducted a control analysis on the same ordinal word positions within only  
422 filler items (where sentence structure varied and therefore nouns and verbs  
423 did not always occur at the same sentence position). This control analysis  
424 did not yield comparably high decoding accuracies. We compared the perfor-  
425 mance of the verb-noun classifier given different sliding time window widths  
426 (50 ms, 100 ms or 200 ms) and feature transformations (concatenating vs av-  
427 eraging over time dimension, feature selection, orthogonalisation and feature  
428 reduction through principal component analysis (PCA), gaussianisation).

429 PCA transforms the data into linearly uncorrelated components, ordered  
430 by the amount of variance explained by each component. Using these un-  
431 correlated components as features can improve the decoding performance of

432 classifiers such as GNB, which assume no feature covariance (Grootswagers  
433 et al. [2017]). Furthermore, PCA allowed our feature selection to be based on  
434 a data-driven approach by keeping only a subset of components that explain  
435 highest variance. We observed that both orthogonalising of features (sensor-  
436 time points) using PCA and feature reduction by restricting training to the  
437 first 60 components only, boosted classification accuracy. Further feature se-  
438 lection based on signal strength (selecting features based on largest difference  
439 in means between classes) did not improve accuracy beyond the the effects  
440 of feature reduction based on PCA. Gaussianisation of the sensor-level data  
441 prior to classification analysis or broadening the training time window did  
442 not yield large differences in performance. Based on these comparisons we  
443 then continued to train the classifier on the noun- vs. verb-attachments with  
444 the optimal parameters.

#### 445 *2.4.2. Representational similarity analysis*

446 Prepositional phrase attachment is interpreted based on the semantic in-  
447 formation given the context preceding the phrase. We therefore predicted  
448 that there might be reactivation of this semantic information (i.e. those se-  
449 mantic features that most strongly influence the attachment) after the dis-  
450 ambiguating sentence-final word. We tested this hypothesis through rep-  
451 resentational similarity analysis (RSA) (Kriegeskorte et al. [2008]), repre-  
452 senting semantic content by means of a high-dimensional word-embedding  
453 vector (semantic vectors). For the word-embeddings we relied on pre-trained



454 models published by facebookresearch<sup>1</sup> which had been trained on German  
455 Wikipedia using fastText (Bojanowski et al. [2016]; Grave et al. [2018]).

456 First, we ensured that the semantic information captured by the word-  
457 embeddings is also encoded in the neural signal. We extracted all segments  
458 of neural data time-locked to each word presented and further restricted the  
459 selection to either content words only for this analysis or sentence-final words  
460 (as described in detail below). We then generated pairwise similarity mea-  
461 sures between those words by computing the euclidean distance between  
462 their corresponding word-embedding vectors (semantic similarity model).  
463 Repeated presentations of the same word were treated as separate words  
464 (i.e. not averaged across). In the same way, we computed pairwise similarity  
465 measures for the corresponding segments in the neural signal, i.e. the pair-  
466 wise neural similarity during reading of the same words. Words that were not  
467 present in the vocabulary of the pre-trained embeddings were excluded from  
468 both semantic model and neural data, which left 387 trials in total. Neural  
469 similarity was computed based on a moving searchlight by concatenating all  
470 samples within a 100 ms time-window and across source locations within a  
471 given parcel, and this was repeated for all parcels and shifting time-windows  
472 (between word onset and 800 ms post onset) with an 80% overlap in time.  
473 Finally, semantic similarity and neural similarity were correlated (Spearman  
474 correlation) at each searchlight position. This resulted in a map indicating  
475 when and where neural activity reflected semantic information about the  
476 perceived words.

---

<sup>1</sup><https://github.com/facebookresearch/fastText/blob/master/pretrained-vectors.md>

477 Crucially, we then generalised this RSA to the post-sentence phase, when  
478 subjects were reading the final, disambiguating word. For this, we re-computed  
479 the neural similarity, this time based on neural activity evoked by the final  
480 word. For each Verb-attached and each Noun-attached PP instead of the  
481 word-embedding of the final noun we assign the word-embedding vector of  
482 the preceding verb or noun respectively (i.e. of the most plausible attach-  
483 ment points). We then recomputed the euclidean distance between word-  
484 embedding vectors for all trial pairs, which now expresses for each sentence  
485 pair the semantics similarity with respect to the disambiguated attachment  
486 sites. Any significant correlations between the neural similarity and the at-  
487 tachment site semantic similarity indicate when and where neural patterns  
488 evoked by reading the final noun are also encoding (i.e. reactivate) informa-  
489 tion about the preceding verb or noun respectively.

#### 490 *2.5. Significance testing of decoding accuracy*

491 When evaluating significance of group-level accuracy differences between  
492 two classifiers (GNB vs. logistic regression; part-of-speech classifier vs. word  
493 position control) we relied on non-parametric permutation testing (Maris  
494 and Oostenveld [2007]), randomly swapping observed accuracy between clas-  
495 sifiers. For statistical evaluation of the GNB classifier against chance level  
496 we relied on information prevalence inference (Allefeld et al. [2016]) based  
497 on subsampling of single-subject permutations. Prevalence inference tests  
498 the significance of above-chance accuracy in the majority of subjects given  
499 the permutation distribution at an alpha level of 0.05. Permutation tests are  
500 preferred over traditional tests against theoretical chance level, given that  
501 the small amount of trials (typical for neuroimaging studies) will lead to

502 larger cross-validation errors (Varoquaux [2017]). Therefore, we computed  
503 null-distributions on randomly re-labeled data for the GNB classification  
504 task. For the binary classification task we randomly selected half of the  
505 items per category (either attachment type or part of speech) and switched  
506 their labels in order to maintain an equal amount of items per class. For  
507 analyses conducted on the source-reconstructed data we used one fixed set  
508 of permutations of the observations for each searchlight to preserve spatial  
509 correlations. The procedure of generating a permutation and subsequent clas-  
510 sification/prediction using permuted labels/semantic vectors was repeated  
511 100 times per subject.

512 To evaluate statistical significance of the correlation values resulting from  
513 the RSA analysis, we used nonparametric permutation tests against a base-  
514 line of zero, including cluster-based correction for multiple comparisons across  
515 time and space.

### 516 **3. Results**

#### 517 *3.1. Behavioral*

518 In the MEG experiment, all subjects had higher than chance level perfor-  
519 mance on answering the comprehension questions. On average they gave 77%  
520 correct answers on sentences from the verb condition, 72% correct answers  
521 for the role condition and 88% correct answers on filler sentences. While  
522 performance on the filler items was above chance for all subjects, some sub-  
523 jects performed at chance for questions from the verb and role conditions  
524 (see Figure 6). Since correct answers to target items depended on the inter-  
525 pretation of the prepositional phrase attachment, this suggests, that some

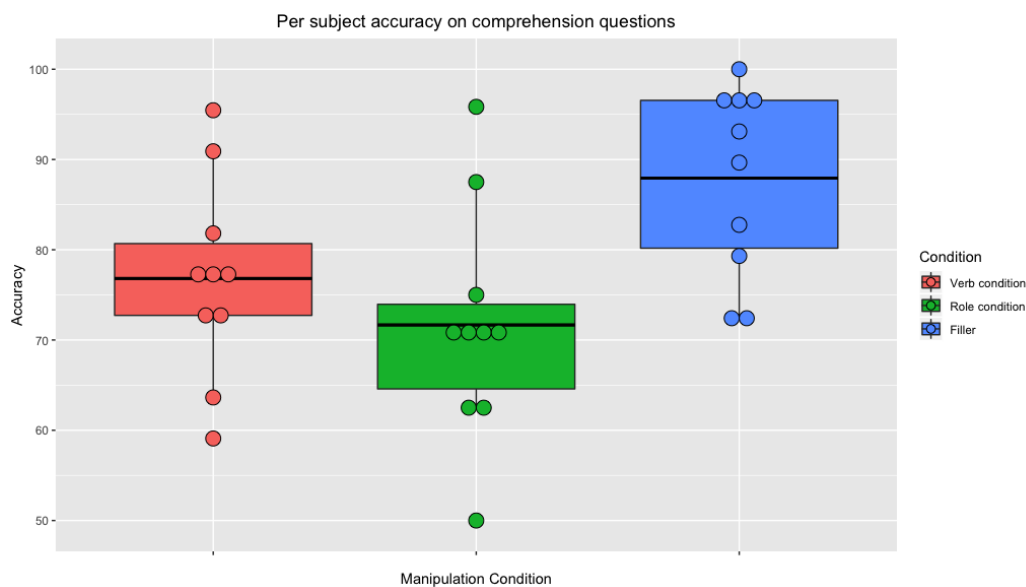

Figure 6: **Accuracy of comprehension questions for each subject per manipulation condition.**

Accuracy across subjects depicted separately for each manipulation condition: Verb condition (left, red), role condition (middle, green) and filler items (right, blue). Individual subject accuracies are plotted as dots.

526 subject's attachment interpretations differed from the norm (as determined  
527 by the pre-test). Within a week after the MEG experiment, each subject had  
528 filled in an online post-test, explicitly rating all stimulus sentences as either  
529 noun or verb attached (following the methods from the pre-test). Average  
530 accuracy across subjects on this post-test did not differ between conditions  
531 (verb and role condition both 81% correct) and subjects interpreted the sen-  
532 tences mostly as intended. Except for two subjects, who performed close to  
533 chance, subjects had a minimum accuracy of 79% (see Figure 7).

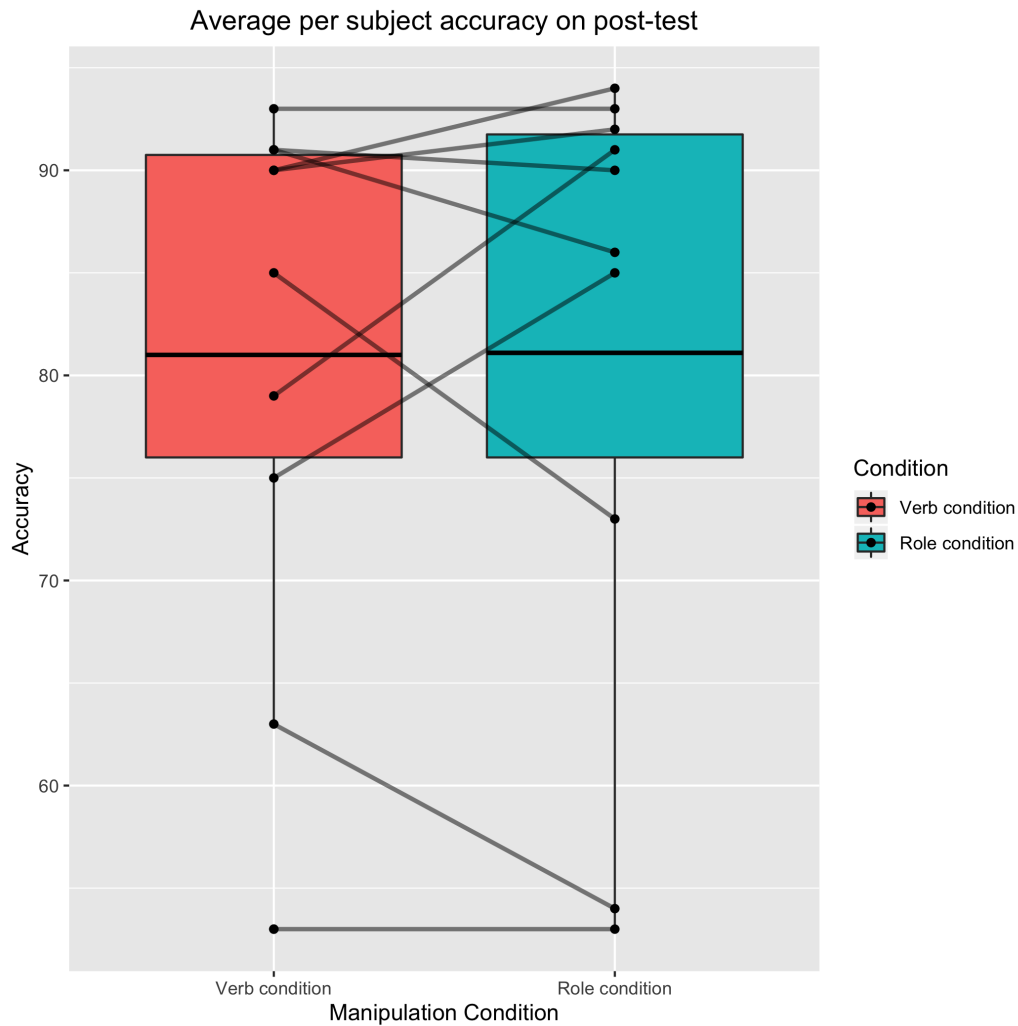

Figure 7: **Accuracy of attachment rating for each subject per manipulation condition.**

Average accuracy is plotted separately for verb condition (left, red) and role condition (right, green). Individual subject accuracies (percentage of items correctly classified) are plotted as black dots.

534 *3.2. Multivariate pattern analysis*

535 *3.2.1. 2-way classification Noun-attached vs Verb-attached*

536 Our main analysis of interest, the 2-way classification of different phrase  
537 structure (Noun attachment vs. Verb attachment) did not reach above chance-  
538 level accuracy at any time window up to 2 seconds after onset of the final  
539 word of a sentence. We observed this null-finding both, when items were  
540 labeled according to the general pre-tested attachments, but also when items  
541 were labeled according to subject-specific post-tests (see red and blue graphs  
542 respectively in Figure 8).

543 *3.2.2. 2-way classification Noun vs Verb*

544 The 2-way classification on whether the currently seen stimulus was a  
545 verb or a noun based on sensor-level MEG data reached a maximal average  
546 accuracy (across subjects) of 67% at 160 ms after word onset and was sig-  
547 nificantly more accurate as compared to the word position classifier ( $p=0$ ,  
548 cluster-corrected permutation tests) up until 460 ms after word onset (see  
549 Figure 9). Note that classification accuracy is already significantly above  
550 chance before the onset of the noun/verb. This is due to the fact that nouns  
551 were always preceded by a determiner and verbs by a noun, effectively turn-  
552 ing the baseline period into a determiner vs. noun classification sample. PCA  
553 transformation of the data led to higher classification accuracy as compared  
554 to training on the raw features. Additional feature selection based on class  
555 means did not lead to further increases in accuracy (see Figure 10). Train-  
556 ing the classifier on moving windows of length 100 ms not only was more  
557 efficient in terms of computation time but also lead to higher classification  
558 accuracies as compared to training the classifier per time point (see Figure

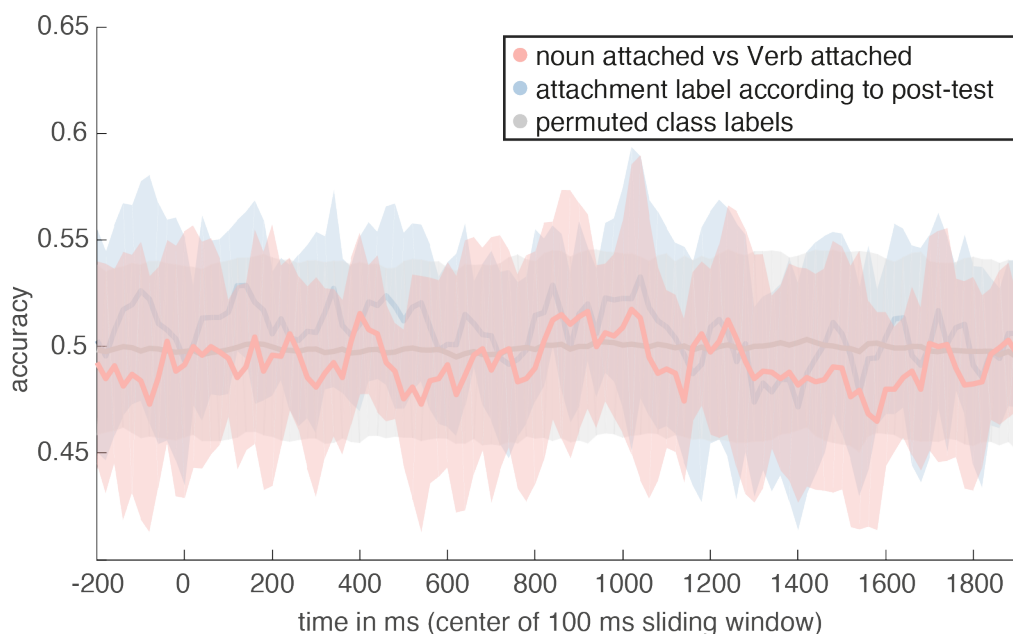

Figure 8: **Attachment classification in sensor space.**

Accuracy of a Gaussian Naive Bayes classifier is plotted for two-way classification of attachment type (noun-attached vs verb-attached). Accuracy is shown for both, a classifier trained on items labeled according to coherent interpretations of sentences during pre-test (red) and a classifier trained on items labeled according to subject-specific post-test interpretations (blue). Observed accuracy was tested against a baseline performance estimate generated by repeatedly classifying data after permuting labels (grey).

559 11). Concatenating sensors of all time points mostly lead to slightly higher  
560 accuracies as compared to averaging over time points before training.

561 Besides Naive Bayes, we also tested different classification algorithms,  
562 i.e. support vector machines and logistic regression. None of these resulted  
563 in higher classification accuracies for the classification of nouns vs verbs (see  
564 Figure 12) as compared to Naive Bayes. Logistic regression performed better  
565 than Naive Bayes for the classification of determiner vs noun.

566 Given that nouns and verbs have some systematic orthographical dif-  
567 ferences in German, we wanted to know whether classification success was  
568 mostly driven by low-level visual cortex. To investigate this, we source-  
569 reconstructed the MEG data and trained several classifiers on different re-  
570 gions across the cortex (searchlight approach). While classification accuracies  
571 were overall lower than those observed based on the sensor-level data, they  
572 were highest in occipital areas (see Figure 13). However, classification was  
573 also significantly above chance in more anterior cortical areas. With increas-  
574 ing time since word onset, classification accuracy increased as well in more  
575 anterior, bilateral occipito-temporal areas (see Figure 13 middle panel for  
576 Brodmann area 37). Between 340 ms and 540 ms, higher level areas like  
577 left inferior central and inferior frontal areas contain information about the  
578 noun-verb distinction (see Figure 13 lower panel for Brodmann area 43).

### 579 *3.2.3. Generalization over time*

580 Concerning the hypothesis that combinatorial processes involve a reanal-  
581 ysis of the to be combined parts, we tested whether after the onset of the  
582 final word of the sentence (the word which disambiguated the structural  
583 attachment of the prepositional phrase) the encoded information of the pre-



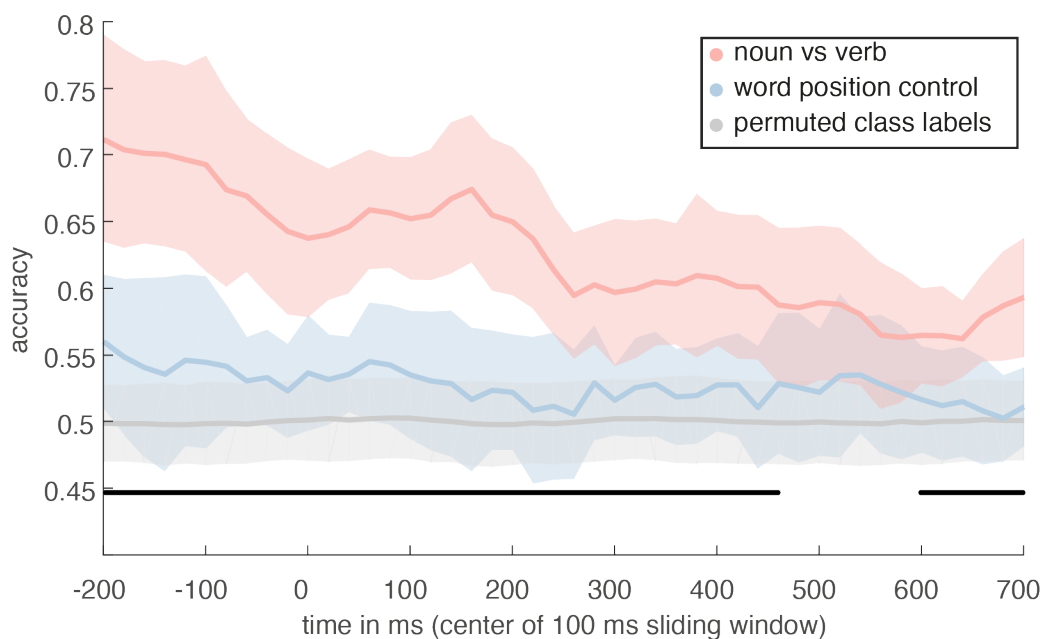

Figure 9: **Part-of-speech 2-way classification in sensor space.**

Accuracy is plotted for part-of-speech classification (nouns vs verbs) using Gaussian Naive Bayes (red) and for classification of word position in filler sentences (blue, varying part-of-speech categories). Black lines indicate when part-of-speech classification is significantly higher as compared to classification on filler items. In addition, a chance performance distribution generated by repeatedly classifying data after permuting labels is depicted in grey.

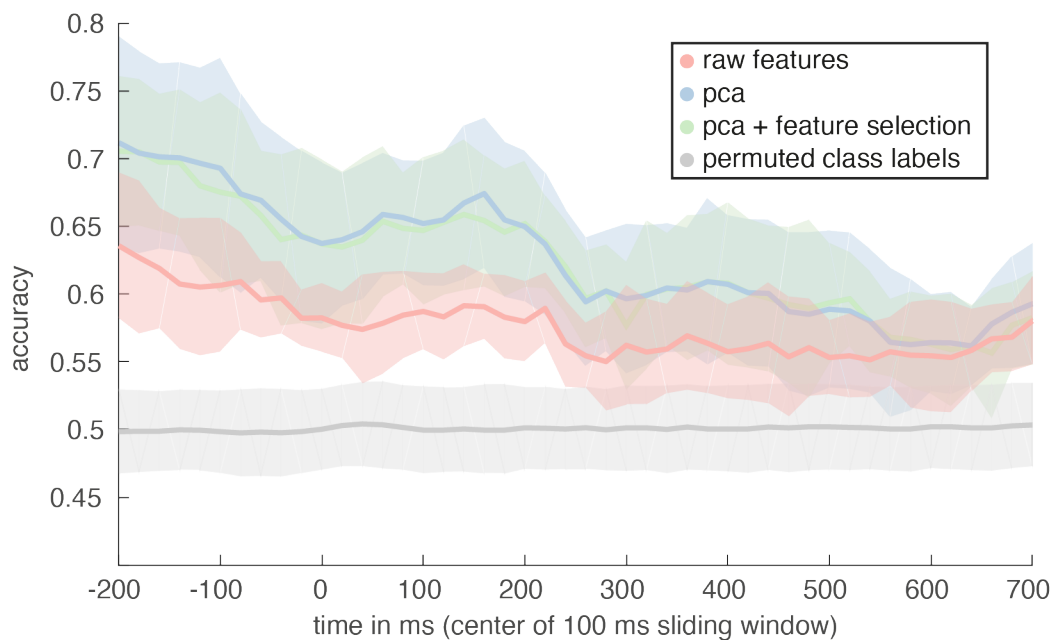

Figure 10: **Feature transformation for 2-way classification.**

Accuracy is plotted for part-of-speech classification (nouns vs verbs) using Gaussian Naive Bayes and different feature reduction choices. Line plots represent the mean accuracy across all subjects and shaded areas represent its standard deviation. We first select evoked neural data from a 100ms (moving) time window and concatenate across all sensors and time points within that window, such that each sensor  $\times$  time point equals one feature. We compare performance of a classifier trained on either the original features (red), on a dimensionality reduced sensor space after selecting only the first 60 components using principal component analysis (PCA, blue) or on a reduced feature space using PCA as well as further only selecting the 150 sensor  $\times$  timepoints with the largest difference in class means (green). A baseline performance estimate was generated by repeatedly classifying data after permuting labels (grey). While feature space reduction through PCA improved classification accuracy, feature selection based on class means did not yield further improvements.

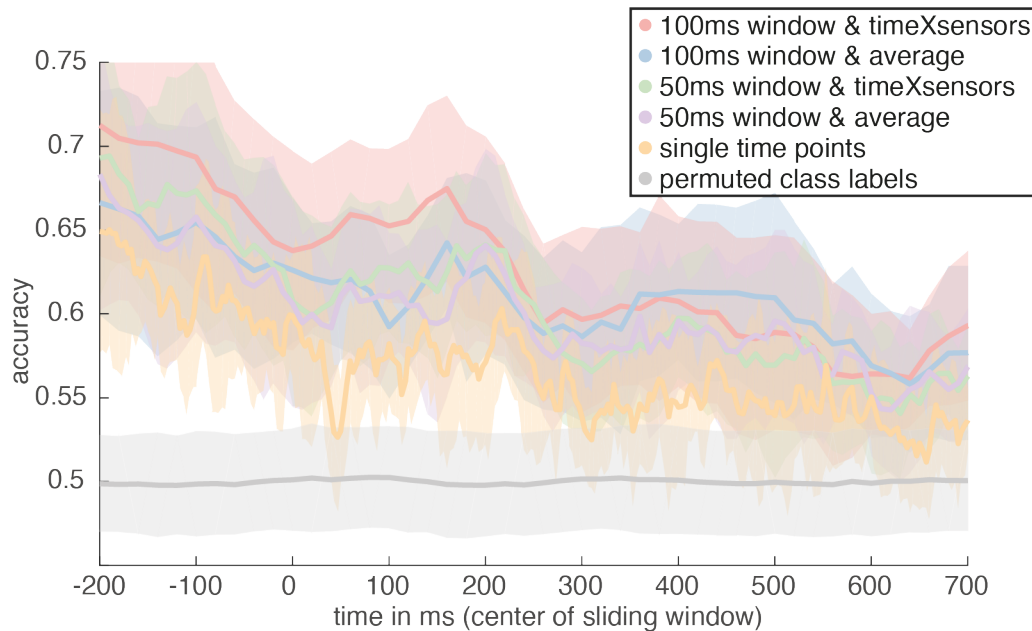

Figure 11: **Time dimension for 2-way classification.**

Accuracy is plotted for part-of-speech classification (nouns vs verbs) using Gaussian Naive Bayes and different options for how to treat time. Line plots represent the mean accuracy across all subjects and shaded areas represent its standard deviation. A baseline performance estimate was generated by repeatedly classifying data after permuting labels (grey). Our moving window approach with window width of 100ms (red & blue) is most efficient in terms of computational time needed. On top of that, reducing the width of the window to 50 ms (green & purple) or even computing a separate model per time point (yellow) did not yield better classification performance. Further, for a window width of 100ms averaging over time points before training the classifier (blue) yielded lower accuracy as compared to concatenating across sensors and time points (red).

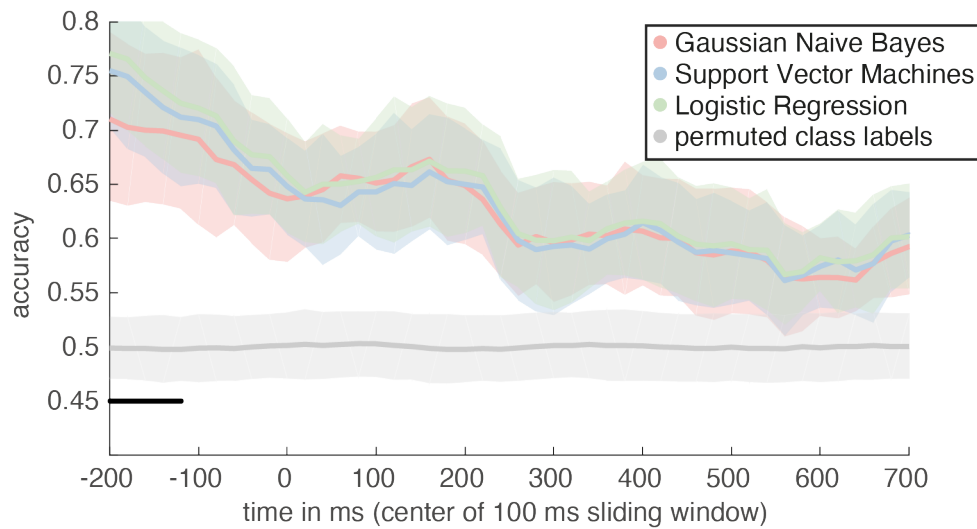

Figure 12: **Comparison of different classification algorithms.**

Accuracy is plotted for part-of-speech classification (nouns vs verbs) using three different linear classifier: Gaussian Naive Bayes (red), support vector machines (blue) and logistic regression (green). Line plots represent the mean accuracy across all subjects and shaded areas represent its standard deviation. A baseline performance estimate was generated by repeatedly classifying data after permuting labels (grey). Significant differences in accuracy between different classifiers is indicated by a black bar.

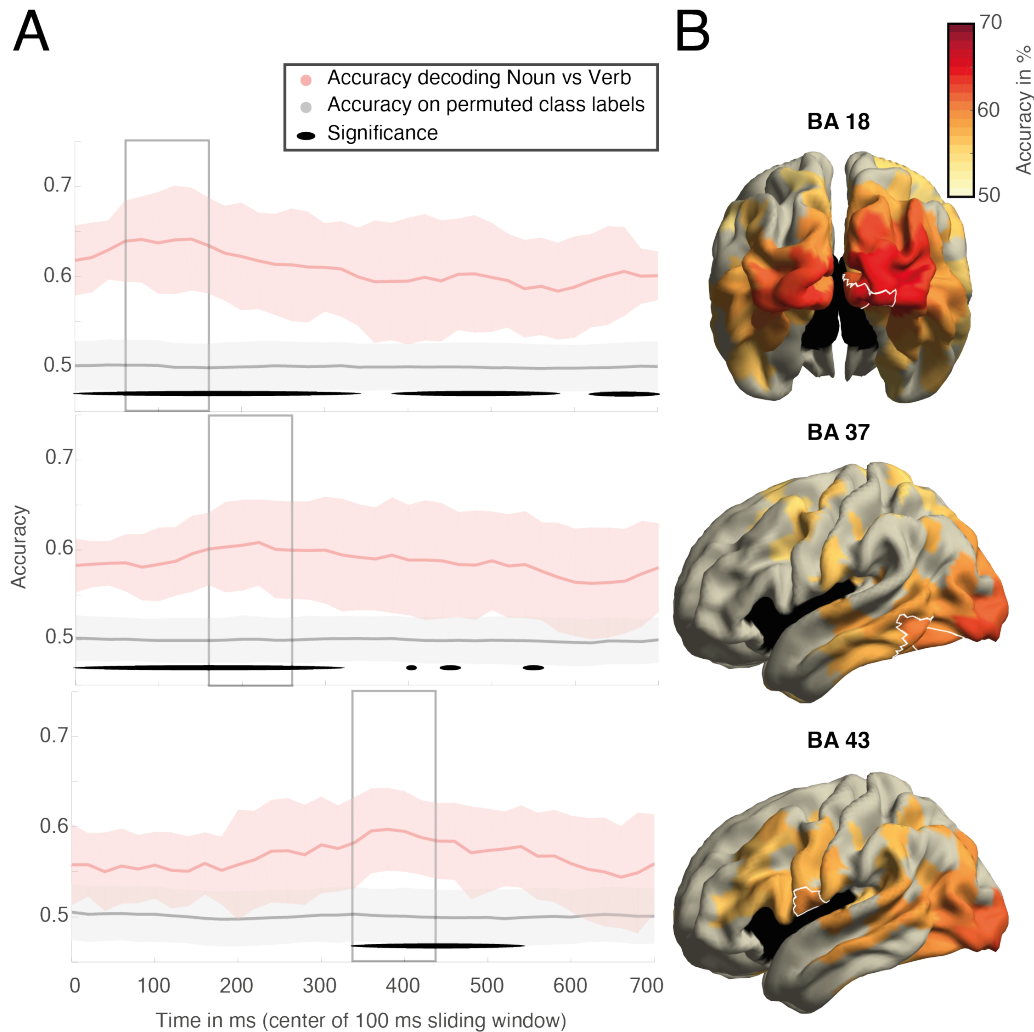

Figure 13: **Part-of-speech 2-way classification in source space.**

Panel A: Accuracy is plotted over time for part-of-speech classification (nouns vs verbs) using Gaussian Naive Bayes (red). Observed accuracy was tested for significance (prevalence statistics, significant time points marked with black line) against a baseline performance estimate generated by repeatedly classifying data after permuting labels (grey). The upper, middle and lower panel display the mean accuracy over time for right occipital parcels (BA 18), left occipitotemporal parcels (BA 37) and left sub-central parcel (BA 43) respectively. Panel B: Cortical maps show the spatial patterns of classification accuracy, masked for significance. White contours outline the parcels for which time-courses are plotted in panel A respectively. Cortical maps contain averaged accuracies over the time-windows defined by the grey boxes.

584 ceding noun or verb would be reactivated in the presence of either a noun-  
585 or verb-attachment respectively. We first investigated whether there was a  
586 reactivation of morphosyntactic information (part of speech) by generalising  
587 the 2-way classification trained on brain data measured during reading of  
588 noun and verbs preceding the prepositional phrase to the period following  
589 the final word of the sentence. Even though the final word was always a noun  
590 we hypothesised that only verb-attached prepositional phrases would in ad-  
591 dition lead to verb-like activity patterns following the final word. However,  
592 contrary to our hypothesis the classifier trained on nouns and verbs in the  
593 context did not accurately classify the post-sentence period of verb-attached  
594 prepositional phrases as more verb-like (see Figure 14).

#### 595 *3.2.4. RSA*

596 For our stimuli, the interpretation of a prepositional phrase attachment  
597 was purely driven by semantic content. Therefore, we might also expect  
598 any reactivation to occur in the form of semantic information. We therefore  
599 tested whether at the time of disambiguation, any of the semantic information  
600 of preceding context would be reactivated. Specifically, we expected the  
601 semantics of the verb to be more strongly activated at the end of a verb-  
602 attached prepositional phrase and the semantics of the noun to be more  
603 strongly activated at the end of a noun-attached prepositional phrase.

604 Our RSA revealed significant correlations between a model of the trial-  
605 by-trial similarity derived from word embeddings and the pairwise similarity  
606 derived from neural data evoked by the corresponding words (see Figure 15).  
607 Activity patterns that correlated with semantic similarity first emerged in a  
608 window from 380 ms to 480 ms in superior parietal cortex. Between 440 and

Training on **context** and generalizing to **end** of sentence  
(e.g., “the insect **frightens** the **child** with the **sting**”)

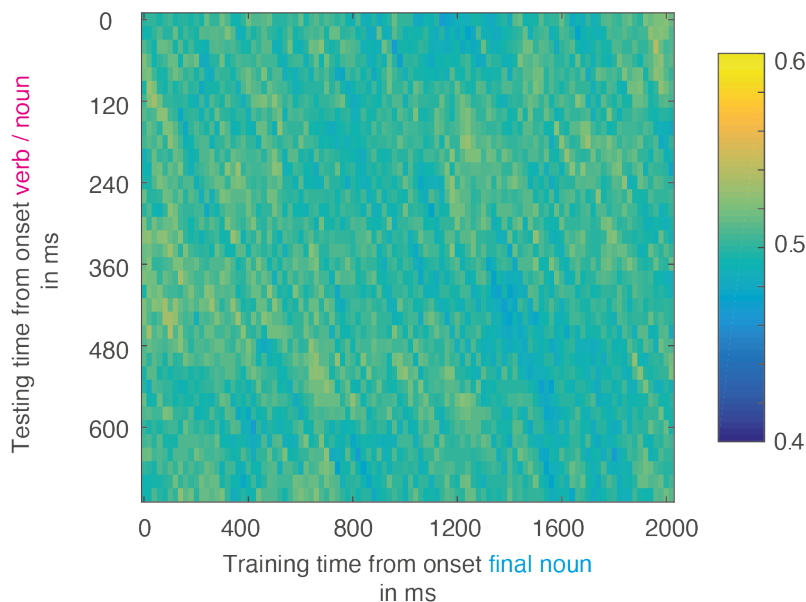

Figure 14: **Generalised classification accuracy for part-of-speech.**

We trained a classifier to distinguish between nouns and verbs based on the neural data evoked by reading one or the other. While training this classifier on a moving time window starting at onset of the noun/verb, we then tested whether the learned weights would generalise to data recorded while reading the end of the corresponding sentence. To illustrate this on a specific stimulus example, on a sentence like 7 “The insect frightens the child with the poisonous sting”, we would train the classifier on distinguishing activity evoked by “frightens” from activity evoked by “child” but we would test the classifier on activity evoked by “sting”. Given that this sentence contains a verb-attached preposition, the correct label for the classifier to identify would be “verb”, regardless of the final word always being a noun. Color codes for classification accuracy at any given training-by-testing time tile. Generalised classification accuracy is not significantly above chance-level at any time point.

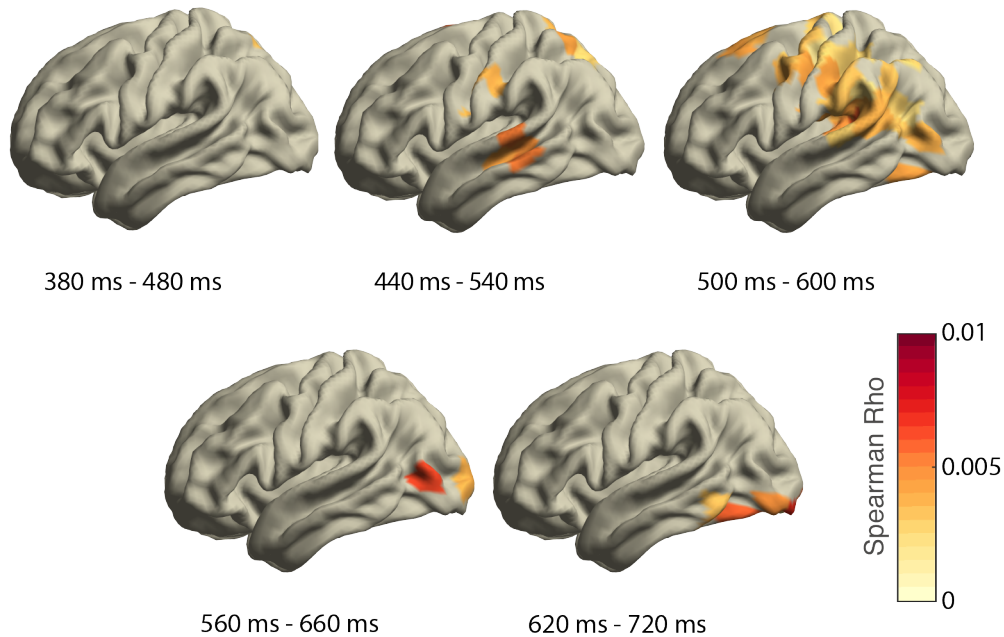

Figure 15: **Searchlight RSA analysis on semantic information as measured by word embeddings.**

Cortical maps show the spatial patterns of correlations with the semantic similarity model (masked for significance) averaged across several time windows. Colour codes strength of correlation.

609 600 ms after word onset, semantic information was represented more exten-  
610 sively across parietal, temporal and occipital regions. Areas in which activity  
611 patterns significantly correlated with semantic similarity included posterior  
612 parietal cortex, somatosensory cortex, angular gyrus, fusiform gyrus, audi-  
613 tory cortex and posterior parts of the superior temporal gyrus. Late after  
614 onset, from 560ms to 720ms only areas in the ventral occipital lobe remained  
615 significantly correlated. When we generalised the RSA to the final word  
616 of the sentence, however, there was no significant correlation with semantic  
617 similarity in any brain area and hence no evidence for semantic reactivation.



## 618 4. Discussion

619 In this study we applied MVPA to probe the neural signal for hierarchical  
620 structure building during online reading of structurally ambiguous sentences.  
621 Subjects read sentences containing verb-attached and noun-attached prepo-  
622 sitional phrases ambiguous with respect to their attachment. We successfully  
623 applied a Naive Bayes classifier to classify part-of-speech information of the  
624 current stimulus from the multidimensional evoked neural activity. We also  
625 successfully extracted neural patterns encoding semantic information of con-  
626 tent words as subjects were reading them, through modelling the pairwise  
627 semantic similarity structure of all word pairs (RSA) with corpus-extracted  
628 word-embeddings. However, none of these measures revealed encoding of  
629 different underlying hierarchical phrase structure for verb- vs noun-attached  
630 sentences at the end of the sentence, when attachment information was dis-  
631 ambiguated through combined semantic information. That is, we did not  
632 find traces of stronger reactivation of either verb or noun in verb- or noun-  
633 attached sentences respectively; not in terms of their part-of-speech identity  
634 nor in terms of their semantic content. Nor were we able to directly train a  
635 classifier to distinguish between verb- and noun-attached PPs across varying  
636 lexical material. In the following, we will discuss several potential explana-  
637 tions for the absence of an effect.

### 638 4.1. *Signal-to-noise ratio*

639 Could it be that our analyses were simply not sensitive enough to reveal  
640 effects of high-level processes such as phrase structure building? Previous  
641 literature relying on MVPA to capture higher-level language processing does

642 not necessarily suggest high-level effects to be smaller as compared to more  
643 perception related effects. For example, Tyler et al. used an RSA approach  
644 to investigate the temporally unfolding syntactic computations during lis-  
645 tening of temporarily ambiguous sentences (Tyler et al. [2013]). While their  
646 more perceptual word identity model correlated robustly with neural activity  
647 ( $\rho > 0.015$ ), when probing more abstract syntactic processing they found  
648 both small and large effects. Specifically, their model quantifying verb sub-  
649 categorization information was only marginally significant and correlations  
650 were much weaker ( $\rho \approx 0.005$ ) and only occurred on the word following  
651 the verb ( $n+1$ ). Their model distinguishing ambiguous from unambiguous  
652 sentences, however, correlated even more strongly ( $\rho > 0.020$ ) with neu-  
653 ral activity at late time points. Unfortunately, it is not straightforward to  
654 compare these effect sizes to our study. Our approach is novel in that we  
655 tried to directly probe neural representations of hierarchical phrase structure  
656 rather than its consequence on ongoing processing demands (e.g. memory  
657 requirements Nelson et al. [2017] or processing effort due to ambiguity Tyler  
658 et al. [2013]). Therefore, it is not immediately clear from those prior studies  
659 whether an MVPA approach is powerful enough to reveal representations of  
660 phrase structure directly.

661 Through additional analyses, targeting orthogonal syntactic information  
662 such as part-of-speech we tried to somewhat assess the sensitivity of our ap-  
663 proach. Our Naive Bayes classifier reached a maximum average accuracy of  
664 67% when trained to distinguish nouns from verbs. Above chance level per-  
665 formance was observed robustly across all subjects. Part-of-speech although  
666 not directly indicative of hierarchical structure, is a higher-level syntactic fea-

667 ture and hence our classifier captured information beyond perceptual signals.  
668 It is important to note, that within our design, the part-of-speech contrast is  
669 partly confounded by physical attributes of the stimulus. Specifically, nouns  
670 and verbs differ in their form as well as their syntactic function (e.g. the  
671 majority of verbs ended in the same inflexional syllable -t signalling third  
672 person singular). We must assume that any decoding success is partly due  
673 to stimulus form. Still, our observations that part-of-speech information can  
674 be decoded from anterior brain regions in addition to occipital cortex suggests  
675 that information was not solely based on the wordform differences. Hence,  
676 while the part-of-speech classifier provides some indication to the utility of  
677 the data with respect to higher-level features, it does not necessarily ensure  
678 the success of decoding more higher-level phenomena such as hierarchical  
679 structure.

680 Furthermore, we also set out to find semantic and syntactic reactivation  
681 of structurally relevant context as a direct consequence of phrase structure  
682 building. Brain data and semantic models correlated with a maximum corre-  
683 lation coefficient smaller than 0.01. This coefficient describes the correlation  
684 with data evoked by stimuli on screen and correlations can be expected to  
685 be substantially smaller when looking at the reactivation period. It is plau-  
686 sible to assume that reactivated neural patterns are harder to detect, as they  
687 are not directly evoked by a stimulus. In the present analyses, we focused  
688 on the time window following the onset of the final word. Content of the  
689 final word, however, was orthogonal to the supposedly reactivated informa-  
690 tion. For example, the last word of the sentence was always a noun and  
691 the same nouns (same semantic information) were presented in both verb-

692 and noun-attached version. Nonetheless, in half of the trials (namely the  
693 verb-attached phrases), we would expect reactivation to reflect semantic and  
694 syntactic information of the preceding verb. The question is, whether MVPA  
695 is sensitive to internally generated, behaviourally relevant information, even  
696 with interfering material driving the neural response. While decoding of se-  
697 mantic category membership has been shown in the absence of a stimulus  
698 on screen (Simanova et al. [2015]), this was only shown for single words. To  
699 our knowledge there are no language studies explicitly probing reactivation  
700 in sentence context through MVPA. Within vision research, however, it has  
701 been shown that during a visual working memory tasks, information about  
702 stimulus orientation could be decoded from EEG during the retention period  
703 only through perturbation using an impulse stimulus (so called ‘ping’) but  
704 would otherwise be undetected (Wolff et al. [2017]). The authors argue that  
705 relevant information is not encoded explicitly in a persistent activity state  
706 but through an item-specific neural response profile that needs to be probed  
707 in order to affect ongoing neural activity. This might also explain why pre-  
708 vious effects of prepositional phrase attachment ambiguity were found not  
709 directly following the disambiguating word but on subsequent words (Tara-  
710 ban and McClelland [1988]; Boudewyn et al. [2014]). Since we did not have a  
711 sentence continuation after the disambiguating noun, we may have been less  
712 sensitive to alterations in response profile caused by attachment structure.

713 Finally, it is possible, that our sensitivity was reduced by temporal vari-  
714 ability in processing of the ambiguous sentences. It can be observed in the  
715 literature, that decoding accuracies are usually largest soon after stimulus  
716 onset and then decrease with increasing time (Cichy et al. [2014]; van Es

717 et al. [2020]). We observe a similar pattern for our part-of-speech clas-  
718 sification performance, which peaks very early after word onset (160 ms)  
719 but then decreases sharply until 250 ms after onset and continues to de-  
720 crease thereafter. Thus, most information seems to be already encoded in  
721 the onset-potential or at least the neural signal might become more salient  
722 due to onset-related synchronisation of postsynaptic potentials. Effects of hi-  
723 erarchical structure building however may be less strictly time-locked events.  
724 Specifically, the varying difficulty in resolving structural ambiguities in our  
725 stimuli might have caused the signal to be jittered in time such that any re-  
726 activation might be less consistently synchronised across trials and subjects.  
727 Generally, each stimulus evokes a cascade of brain processes (both bottom-  
728 up and top-down) which all can vary slightly in their duration depending on  
729 context and individual and may therefore lead to more substantial variation  
730 in later, high-level brain processing as compared to initial bottom-up process-  
731 ing. Such temporal variability might have led to lower sensitivity for finding  
732 our effect as well. Future analyses should take temporal variability explicitly  
733 into account to not encounter the same issue. To achieve this, probabilis-  
734 tic frameworks for data-driven estimation of brain states could be used to  
735 align processing and overcome temporal variability. For example, Vidaurre  
736 et al. have developed an analysis that not only defines multiple representa-  
737 tional states that dynamically encode the stimulus but also specifies which  
738 of these states is active when in time (Vidaurre et al. [2019]).

#### 739 *4.2. Shallow processing*

740 Assuming that our signal to noise ratio in principle allows to capture  
741 neural representations of hierarchical structure, we will now turn to some

742 more cognitive explanations for our failure to decode such structural repre-  
743 sentations. It is possible that readers do not compute phrase structure by  
744 default and at all times. Specifically, our experiment may have discouraged  
745 any detailed syntactic processing and subjects may have been engaged in  
746 “shallow” processing instead, similar to what has been reported before for  
747 garden-path sentences under the term “good-enough processing” (Ferreira  
748 and Patson [2007]; Ferreira and Lowder [2016]; Traxler [2014]). The idea of  
749 good-enough processing is that readers often arrive at a semantic proposition  
750 when interpreting a sentence without conducting a full syntactic (re)analysis.  
751 The recently established link between shallow processing and information  
752 structure (Ferreira and Lowder [2016]) further increases the plausibility of  
753 prepositional phrases falling victim to this strategy as well. Specifically, Fer-  
754 reira & Lowder suggest that processing effort is usually directed towards  
755 parts of a sentence that constitute new rather than given information. The  
756 motivation for such a strategy is twofold. Firstly, it would maximise the suc-  
757 cess of integration of newly received information. And secondly, since given  
758 information links to prior discourse it is also more likely to be redundant  
759 and therefore more likely to survive “shallow” processing. It might not be  
760 obvious why our experiment should be affected by such shallow processing,  
761 given that we presented subjects with unrelated sentences without any larger  
762 discourse context to drive information structure. PPs are, however, making  
763 up the subordinate clause of the sentence, which is standardly viewed as  
764 communicating previously known information (Hornby [1974]) rather than  
765 new. Hence, it is possible that structurally inherent information structure in  
766 sentences with PPs causes readers to allocate less processing resources onto

767 the structural disambiguation of the attachment. This would also be in line  
768 with processing accounts where hierarchical operations are not assumed as  
769 the default (Frank et al. [2012]). It is assumed that such processing strategies  
770 can be overwritten by strong task demands. For example, previous research  
771 has shown that syntactic task demands can reveal a P600 when there was  
772 none evoked by a purely semantic task (Mongelli [2020]). Indeed, many pre-  
773 vious studies probing syntactic processing make use of syntactic tasks such  
774 as grammaticality judgments (Tyler et al. [2013]). In our study, however,  
775 subjects had to respond in only 25% of the trials and even on those trials,  
776 comprehension questions were not always probing knowledge about the PP  
777 region. The absence of a task and the fact that thematic role assignment  
778 could only be based on semantic cues in the first place may have discouraged  
779 a deep analysis of phrase structure.

780 The good-enough processing hypothesis further implies that hierarchical  
781 structure need not be computed at all in order to assign thematic roles. In-  
782 stead, the semantic implications of the assigned thematic roles would be the  
783 sole outcome of successful sentence processing. Semantics of thematic roles  
784 are more complex and numerous than their possible corresponding phrase  
785 structures. Through adopting a strictly binary distinction of verb- and noun  
786 attachments we have intentionally ignored this semantic variation to target  
787 only the structural differences. However, as mentioned before, phrase struc-  
788 ture and thematic roles are somewhat related and hence can easily become  
789 confounded. In fact, the relationship between thematic roles and syntactic  
790 structure is somewhat asymmetric to begin with. While any given thematic

791 role is always bound to a certain syntactic structure<sup>2</sup>, this is not a bidirec-  
792 tional relationship. For example an instrument role will always be expressed  
793 in a verb-attached PP, but not every verb-attached phrase structure is nec-  
794 essarily carrying information about instruments (see sentences 8 & 9 for  
795 alternative role example).

796 8. The girl cuts the apple with a knife. (instrument role)

797 9. The girl cuts the apple with vigour. (manner role)

798 Taraban et al. have shown that previously reported reading time effects  
799 of PPs can be explained largely by expectations about thematic role. Specif-  
800 ically, they showed that unexpected structural attachment (verb- or noun  
801 attachment) do not delay reading times beyond the effect of thematic role  
802 expectations (Taraban and McClelland [1988]). The P600 effects reported  
803 by Boudewyn et al. could have also been driven by the semantics of the  
804 associated thematic roles rather than structure per se. In their stimulus  
805 set all verb-attached stimuli contained PPs expressing an instrument and all  
806 noun-attached PPs expressed an attribute. Moreover, most of their sentences  
807 contained action verbs (which bias towards expectations for instrument roles  
808 to begin with). Their P600 could therefore just as well be a marker for sur-  
809 prisal due to the unexpected thematic role in noun-attached sentences. In  
810 our study, we had more varying verb types (almost a third of all verbs were  
811 perception verbs) and more varying thematic roles (see table 1). However,  
812 the definition of thematic roles can be murky and the less common ones are

---

<sup>2</sup>Assuming that the thematic role is explicitly expressed and does not result from coercion



813 usually poorly defined. With the exception of agent and patient role, the  
 814 psychological reality of certain thematic roles (even as prominent as the in-  
 815 strument role) can be debated (Rissman and Majid [2019]). It is therefore  
 816 difficult to systematically manipulate this dimension. Nonetheless, through  
 817 using more varied thematic roles and verbs we have created a more natu-  
 818 ralistic stimulus set as compared to previous studies, potentially weakening  
 819 effects of thematic role expectations, that likely have been driving previous  
 820 findings of divergent neural activity between noun- and verb-attached PPs.

|    |            |             |                                                                                                                                                       |
|----|------------|-------------|-------------------------------------------------------------------------------------------------------------------------------------------------------|
| VA | action     | I<br>M<br>G | The painter paints the wall with the fresh paint.<br>The student writes the exam with few errors.<br>The state supplies households with a power grid. |
|    | perception | I/M<br>G    | The customer angers the waitress with her rude manners.                                                                                               |
| NA | action     | AT<br>AC    | The politician pays the taxi driver with the annoying manners.<br>The intern wraps the bread with the organic butter.                                 |
|    | perception | AT<br>AC    | the chef likes the salad with the local herbs.<br>The paramedic spots the sick person with a furry teddybear.                                         |

Table 1: *Example sentences. For each verb-attached (VA) or noun-attached (NA) PP several thematic roles could occur within the stimuli. Possible roles are instrument role (I), manner role (M), goal role (G), attribute role (AT) accompanying role (AC). Categorisation of thematic roles following those in Taraban and McClelland [1988]*

821 In conclusion, with this study we could not identify a neural represen-  
 822 tation of hierarchical structure using MVPA. We did show, however, that  
 823 our MVPA approach was in principle sensitive to both syntactic and seman-  
 824 tic information encoded in the neural signal. Further, we did not find any  
 825 differences between processing verb- or noun-attached prepositional phrases  
 826 unlike previous studies have suggested. We speculate that this was partly  
 827 due to our well controlled and semantically varied sentence material. In the  
 828 future, a more fine-grained characterisation of the semantic dimensions driv-

829 ing attachment decisions and the systematical manipulation of thematic roles  
830 may help to establish any differences in processing PPs at a purely structural  
831 level.

## 832 5. References

833 Carsten Allefeld, Kai Gorgen, and John Dylan Haynes. Valid population  
834 inference for information-based imaging: From the second-level t-test to  
835 prevalence inference. *NeuroImage*, 141:378–392, 2016. ISSN 10959572. doi:  
836 10.1016/j.neuroimage.2016.07.040. URL [http://dx.doi.org/10.1016/  
837 j.neuroimage.2016.07.040](http://dx.doi.org/10.1016/j.neuroimage.2016.07.040).

838 Gerry Altmann and Mark Steedman. Interaction with context during human  
839 sentence processing. *Cognition*, 30(3):191–238, 1988. ISSN 00100277. doi:  
840 10.1016/0010-0277(88)90020-0.

841 D Bates, M Maechler, B Bolker, S Walker, R Haubo Bojesen Christensen,  
842 and Others. lme4: Linear mixed-effects models using Eigen and S4. R  
843 package version 1.1–7. 2014, 2015.

844 K Bock. Syntactic persistence in language processing. *Cognitive Psychology*,  
845 18:355–387, 1986.

846 Piotr Bojanowski, Edouard Grave, Armand Joulin, and Tomas Mikolov. En-  
847 riching Word Vectors with Subword Information. 5:135–146, 2016. URL  
848 <http://arxiv.org/abs/1607.04606>.

849 Megan A Boudewyn, Megan Zirnstein, Tamara Y Swaab, and Matthew J  
850 Traxler. Priming prepositional phrase attachment: evidence from eye-  
851 tracking and event-related potentials. *Quarterly journal of experimental  
852 psychology*, 67(3):424–54, 2014. ISSN 1747-0226. doi: 10.1080/17470218.  
853 2013.815237. URL <http://www.ncbi.nlm.nih.gov/pubmed/23859219>.

- 854 Sabine Brants, Stefanie Dipper, Peter Eisenberg, Silvia Hansen-Schirra, Es-  
855 ther König, Wolfgang Lezius, Christian Rohrer, George Smith, and Hans  
856 Uszkoreit. TIGER: Linguistic Interpretation of a German Corpus. *Re-*  
857 *search on Language and Computation*, 2(4):597–620, 2004. ISSN 1572-  
858 8706. doi: 10.1007/s11168-004-7431-3. URL [http://dx.doi.org/10.](http://dx.doi.org/10.1007/s11168-004-7431-3)  
859 [1007/s11168-004-7431-3](http://dx.doi.org/10.1007/s11168-004-7431-3).
- 860 Carsten Schmitz. LimeSurvey: An Open Source survey tool, 2012. URL  
861 <http://www.limesurvey.org>.
- 862 Radoslaw Martin Cichy, Dimitrios Pantazis, and Aude Oliva. Resolving hu-  
863 man object recognition in space and time. *Nature Neuroscience*, 17(3):  
864 455–462, 2014. ISSN 10976256. doi: 10.1038/nn.3635.
- 865 Cas W Coopmans, Helen De Hoop, Karthikeya Kaushik, Peter Hagoort,  
866 and Andrea E Martin. Structure-(in)dependent Interpretation of Phrases  
867 in Humans and LSTMs. *Proceedings of the Society for Computation in*  
868 *Linguistics*, 4(58), 2021.
- 869 Anders M Dale, Bruce Fischl, and Martin I Sereno. Cortical surface-based  
870 analysis: I. Segmentation and surface reconstruction. *Neuroimage*, 9(2):  
871 179–194, 1999.
- 872 Tyler Davis, Karen F. LaRocque, Jeanette A. Mumford, Kenneth A. Norman,  
873 Anthony D. Wagner, and Russell A. Poldrack. What do differences between  
874 multi-voxel and univariate analysis mean? How subject-, voxel-, and trial-  
875 level variance impact fMRI analysis. *NeuroImage*, 97:271–283, 2014. ISSN

876 10959572. doi: 10.1016/j.neuroimage.2014.04.037. URL <http://dx.doi.org/10.1016/j.neuroimage.2014.04.037>.

878 Fernanda Ferreira and Matthew W. Lowder. *Prediction, Information Structure, and Good-Enough Language Processing*, volume 65. Elsevier Ltd,  
879 2016. ISBN 9780128047903. doi: 10.1016/bs.plm.2016.04.002. URL  
880 <http://dx.doi.org/10.1016/bs.plm.2016.04.002>.

882 Fernanda Ferreira and Nikole D. Patson. The ‘Good Enough’ Approach  
883 to Language Comprehension. *Language and Linguistics Compass*, 1  
884 (1-2):71–83, 2007. ISSN 1749-818X. doi: 10.1111/j.1749-818X.2007.  
885 00007.x. URL <http://dx.doi.org/10.1111/j.1749-818X.2007.00007.x>.

887 Hartmut Fitz and Franklin Chang. Sentence-level ERP effects as error prop-  
888 agation: A neurocomputational model. *Cognitive Psychology*, pages 1–46,  
889 2018. doi: 10.31234/OSF.IO/FRX2W.

890 Stefan L. Frank and Rens Bod. Insensitivity of the human sentence-  
891 processing system to hierarchical structure. *Psychological Science*, 22(6):  
892 829–834, 2011. ISSN 09567976. doi: 10.1177/0956797611409589.

893 Stefan L. Frank, Rens Bod, and Morten H. Christiansen. How hierarchical  
894 is language use? *Proceedings of the Royal Society B: Biological Sciences*,  
895 279(1747):4522–4531, 2012. ISSN 14712954. doi: 10.1098/rspb.2012.1741.

896 Lyn Frazier and Keith Rayner. Making and correcting errors during sentence  
897 comprehension: Eye movements in the analysis of structurally ambiguous  
898 sentences. *Cognitive psychology*, 14(2):178–210, 1982.

899 Edouard Grave, Piotr Bojanowski, Prakhar Gupta, Armand Joulin, and  
900 Tomas Mikolov. Learning word vectors for 157 languages. In *Proceedings*  
901 *of the International Conference on Language Resources and Evaluation*  
902 *(LREC 2018)*, 2018.

903 Tijl Grootswagers, Susan G. Wardle, and Thomas A. Carlson. Decoding Dy-  
904 namic Brain Patterns from Evoked Responses: A Tutorial on Multivari-  
905 ate Pattern Analysis Applied to Time Series Neuroimaging Data. *Jour-*  
906 *nal of cognitive neuroscience*, 29(4):677–697, 2017. ISSN 09528229. doi:  
907 10.1162/jocn.

908 Matthias Guggenmos, Philipp Sterzer, and Radoslaw Martin Cichy. Mul-  
909 tivariate pattern analysis for MEG: A comparison of dissimilarity mea-  
910 sures. *NeuroImage*, 173(August 2017):434–447, 2018. ISSN 10959572.  
911 doi: 10.1016/j.neuroimage.2018.02.044. URL [https://doi.org/10.1016/](https://doi.org/10.1016/j.neuroimage.2018.02.044)  
912 [j.neuroimage.2018.02.044](https://doi.org/10.1016/j.neuroimage.2018.02.044).

913 Peter Hagoort. The core and beyond in the language-ready brain. *Neu-*  
914 *roscience and Biobehavioral Reviews*, 81:194–204, 2017. ISSN 18737528.  
915 doi: 10.1016/j.neubiorev.2017.01.048. URL [https://doi.org/10.1016/](https://doi.org/10.1016/j.neubiorev.2017.01.048)  
916 [j.neubiorev.2017.01.048](https://doi.org/10.1016/j.neubiorev.2017.01.048).

917 Peter A. Hornby. Surface structure and presupposition. *Journal of Verbal*  
918 *Learning and Verbal Behavior*, 13(5):530–538, 1974. ISSN 00225371. doi:  
919 10.1016/S0022-5371(74)80005-8.

920 Ray Jackendoff. Précis of Foundations of Language:. *Behavioral and*

921 *Brain Sciences*, 26(2003):651–707, 2003. ISSN 0140-525X. doi: 10.1017/  
922 S0140525X03000153.

923 T. Florian Jaeger. Categorical data analysis: Away from ANOVAs (transfor-  
924 mation or not) and towards logit mixed models. *Journal of Memory and*  
925 *Language*, 59(4):434–446, 2008. ISSN 0749596X. doi: 10.1016/j.jml.2007.  
926 11.007. URL <http://dx.doi.org/10.1016/j.jml.2007.11.007>.

927 Koji Jimura and Russell A. Poldrack. Analyses of regional-average ac-  
928 tivation and multivoxel pattern information tell complementary stories.  
929 *Neuropsychologia*, 50(4):544–552, 2012. ISSN 00283932. doi: 10.1016/  
930 j.neuropsychologia.2011.11.007. URL [http://dx.doi.org/10.1016/j.](http://dx.doi.org/10.1016/j.neuropsychologia.2011.11.007)  
931 [neuropsychologia.2011.11.007](http://dx.doi.org/10.1016/j.neuropsychologia.2011.11.007).

932 Nikolaus Kriegeskorte, Marieke Mur, and Peter A Bandettini. Representa-  
933 tional similarity analysis-connecting the branches of systems neuroscience.  
934 *Frontiers in systems neuroscience*, 2:4, 2008.

935 Eric Maris and Robert Oostenveld. Nonparametric statistical testing of EEG-  
936 and MEG-data. *Journal of Neuroscience Methods*, 164(1):177–190, 2007.  
937 ISSN 01650270. doi: 10.1016/j.jneumeth.2007.03.024.

938 James L McClelland and Alan H Kawamoto. Mechanisms of sentence pro-  
939 cessing: Assigning roles to constituents. In *Parallel distributed processing:*  
940 *explorations in the microstructure of cognition, vol. 2: psychological and*  
941 *biological models*, pages 272–325. 1986.

942 Tom M Mitchell. *Machine learning*, volume 45. 1997.

943 Mohamed Taha Mohamed and Charles Jr. Clifton. Processing temporary  
944 syntactic ambiguity: The effect of contextual bias. *Quarterly journal of*  
945 *experimental psychology (2006)*, 64(9):1797–1820, 2011. ISSN 1747-0218.  
946 doi: 10.1080/17470218.2011.582127.

947 Valeria Mongelli. *The role of neural feedback in language unification: How*  
948 *awareness affects combinatorial processing*. PhD thesis, Radboud Univer-  
949 sity Nijmegen Nijmegen, 2020.

950 Marieke Mur, Peter A. Bandettini, and Nikolaus Kriegeskorte. Revealing  
951 representational content with pattern-information fMRI - An introductory  
952 guide. *Social Cognitive and Affective Neuroscience*, 4(1):101–109, 2009.  
953 ISSN 17495016. doi: 10.1093/scan/nsn044.

954 M. Nelson, I El Karoui, K Giber, X Yang, L Cohen, H Koopman, S Cash,  
955 L Naccache, J Hale, C Pallier, S Dehaene, Cognitive Neuroimaging Unit,  
956 and Los Angeles. Neurophysiological dynamics of phrase-structure building  
957 during sentence processing. pages 1–21, 2017. ISSN 0027-8424. doi: 10.  
958 1073/pnas.1701590114.

959 Guido Nolte. The magnetic lead field theorem in the quasi-static approx-  
960 imation and its use for magnetoencephalography forward calculation in  
961 realistic volume conductors. *Physics in Medicine and Biology*, 48(22):3637–  
962 3652, 2003. ISSN 00319155. doi: 10.1088/0031-9155/48/22/002.

963 Kenneth A. Norman, Sean M. Polyn, Greg J. Detre, and James V. Haxby.  
964 Beyond mind-reading: multi-voxel pattern analysis of fMRI data. *Trends*



965 *in Cognitive Sciences*, 10(9):424–430, 2006. ISSN 13646613. doi: 10.1016/  
966 j.tics.2006.07.005.

967 Kayoko Okada, Feng Rong, Jon Venezia, William Matchin, I. Hui Hsieh,  
968 Kouros Saberi, John T. Serences, and Gregory Hickok. Hierarchical or-  
969 ganization of human auditory cortex: Evidence from acoustic invariance  
970 in the response to intelligible speech. *Cerebral Cortex*, 20(10):2486–2495,  
971 2010. ISSN 10473211. doi: 10.1093/cercor/bhp318.

972 Robert Oostenveld, Pascal Fries, Eric Maris, and Jan Mathijs Schoffelen.  
973 FieldTrip: Open source software for advanced analysis of MEG, EEG, and  
974 invasive electrophysiological data. *Computational Intelligence and Neuro-*  
975 *science*, 2011:1–9, 2011. ISSN 16875273. doi: 10.1155/2011/156869.

976 Christophe Pallier, Anne-Dominique Devauchelle, and Stanislas Dehaene.  
977 Cortical representation of the constituent structure of sentences. *Proceed-*  
978 *ings of the National Academy of Sciences of the United States of America*,  
979 108(6):2522–7, feb 2011. ISSN 1091-6490. doi: 10.1073/pnas.1018711108.  
980 URL <http://www.pnas.org/cgi/content/long/108/6/2522>.

981 Friedemann Pulvermüller, Yury Shtyrov, and Olaf Hauk. Understanding in  
982 an instant: Neurophysiological evidence for mechanistic language circuits  
983 in the brain. *Brain and Language*, 110(2):81–94, 2009. ISSN 0093934X.  
984 doi: 10.1016/j.bandl.2008.12.001. URL [http://dx.doi.org/10.1016/j.](http://dx.doi.org/10.1016/j.bandl.2008.12.001)  
985 [bandl.2008.12.001](http://dx.doi.org/10.1016/j.bandl.2008.12.001).

986 Milena Rabovsky, Steven S Hansen, and James L McClelland. Modelling  
987 the N400 brain potential as change in a probabilistic representation of

988 meaning. *Nature Human Behaviour*, 2(9):693–705, 2018. ISSN 23973374.  
989 doi: 10.1038/s41562-018-0406-4. URL <http://dx.doi.org/10.1038/s41562-018-0406-4>.  
990

991 Rajeev D.S. Raizada, Feng Ming Tsao, Huei Mei Liu, and Patricia K. Kuhl.  
992 Quantifying the adequacy of neural representations for a cross-language  
993 phonetic discrimination task: Prediction of individual differences. *Cerebral*  
994 *Cortex*, 20(1):1–12, 2010. ISSN 10473211. doi: 10.1093/cercor/bhp076.

995 Keith Rayner, Marcia Carlson, and Lyn Frazier. The Interaction of Syntax  
996 and Semantics During Sentence Processing: Eye Movements in the Anal-  
997 ysis of Semantically Biased Sentences. *Journal of Verbal Learning and*  
998 *Verbal Behavior*, 22(3):358–374, 1983.

999 Lilia Rissman and Asifa Majid. Thematic roles : Core knowledge or linguistic  
1000 construct ? *Psychonomic Bulletin & Review*, 2019.

1001 Irina Simanova, Marcel A J van Gerven, Robert Oostenveld, and Peter Ha-  
1002 goort. Predicting the Semantic Category of Internally Generated Words  
1003 from Neuromagnetic Recordings. *Journal of Cognitive Neuroscience*, 27  
1004 (1):35–45, 2015. doi: 10.1162/jocn.a.00690. URL <https://doi.org/10.1162/jocn.a.00690>.  
1005

1006 Michael Spivey-Knowlton and Julie C Sedivy. Resolving attachment ambi-  
1007 guities with multiple constraints. *Cognition*, 55(3):227–267, 1995. ISSN  
1008 00100277. doi: 10.1016/0010-0277(94)00647-4.

1009 Arjen Stolk, Ana Todorovic, Jan Mathijs Schoffelen, and Robert Oosten-  
1010 veld. Online and offline tools for head movement compensation in MEG.

1011 *NeuroImage*, 68:39–48, 2013. ISSN 10538119. doi: 10.1016/j.neuroimage.  
1012 2012.11.047. URL [http://dx.doi.org/10.1016/j.neuroimage.2012.](http://dx.doi.org/10.1016/j.neuroimage.2012.11.047)  
1013 11.047.

1014 Roman Taraban and James L McClelland. Constituent Attachment and  
1015 Thematic Role Assignment in Sentence Processing: Influences of content-  
1016 based expectations. *Journal of Memory and Language*, 27:597–632, 1988.

1017 Matthew J. Traxler. Trends in syntactic parsing: Anticipation, Bayesian  
1018 estimation, and good-enough parsing. *Trends in Cognitive Sciences*, 18  
1019 (11):605–611, 2014. ISSN 1879307X. doi: 10.1016/j.tics.2014.08.001. URL  
1020 <http://dx.doi.org/10.1016/j.tics.2014.08.001>.

1021 Matthew J. Traxler and Kristen M. Tooley. Lexical mediation and context  
1022 effects in sentence processing. *Brain Research*, 1146(1):59–74, 2007. ISSN  
1023 00068993. doi: 10.1016/j.brainres.2006.10.010.

1024 Lorraine K. Tyler, Teresa P.L. Cheung, Barry J. Devereux, and Alex Clarke.  
1025 Syntactic computations in the language network: Characterizing dynamic  
1026 network properties using representational similarity analysis. *Frontiers in*  
1027 *Psychology*, 4(MAY):1–19, 2013. ISSN 16641078. doi: 10.3389/fpsyg.2013.  
1028 00271.

1029 Daniëlle Van Den Brink and Peter Hagoort. The influence of seman-  
1030 tic and syntactic context constraints on lexical selection and integra-  
1031 tion in spoken-word comprehension as revealed by ERPS. *Journal of*  
1032 *Cognitive Neuroscience*, 16(6):1068–1084, 2004. ISSN 0898929X. doi:  
1033 10.1162/0898929041502670.

- 1034 Mats WJ van Es, Tom R Marshall, Eelke Spaak, Ole Jensen, and Jan-Mathijs  
1035 Schoffelen. Phasic modulation of visual representations during sustained  
1036 attention. *European Journal of Neuroscience*, 2020.
- 1037 M Van Gerven, A Bahramisharif, J Farquhar, and T Heskes. Donders Ma-  
1038 chine Learning Toolbox (DMLT). <https://github.com/distrep/DMLT>, ver-  
1039 sion, 26(06):2013, 2013.
- 1040 B. D. Van Veen, W van Drongelen, M Yuchtman, and A Suzuki. Localiza-  
1041 tion of brain electrical activity via linearly constrained minimum variance  
1042 spatial filtering. *IEEE Transactions on Biomedical Engineering*, 44(9):  
1043 867–880, 1997. ISSN 0018-9294. doi: 10.1109/10.623056.
- 1044 Gaël Varoquaux. Cross-validation failure: Small sample sizes lead to large  
1045 error bars. *NeuroImage*, (April):1–10, 2017. ISSN 10959572. doi: 10.1016/  
1046 j.neuroimage.2017.06.061.
- 1047 Diego Vidaurre, Nicholas E. Myers, Mark Stokes, Anna C. Nobre, and  
1048 Mark W. Woolrich. Temporally Unconstrained Decoding Reveals Con-  
1049 sistent but Time-Varying Stages of Stimulus Processing. *Cerebral Cortex*,  
1050 29(2):863–874, 2019. ISSN 14602199. doi: 10.1093/cercor/bhy290.
- 1051 Michael J. Wolff, Janina Jochim, Elkan G. Akyürek, and Mark G. Stokes. Dy-  
1052 namic hidden states underlying working-memory-guided behavior. *Nature*  
1053 *Neuroscience*, 20(6):864–871, 2017. ISSN 15461726. doi: 10.1038/nn.4546.
- 1054 Atsushi Yokoi and Jörn Diedrichsen. Neural Organization of Hierarchical  
1055 Motor Sequence Representations in the Human Neocortex. *Neuron*, 103(6):  
1056 1178–1190.e7, 2019. ISSN 10974199. doi: 10.1016/j.neuron.2019.06.017.

1057 Jayden Ziegler, Giulia Bencini, Adele Goldberg, and Jesse Snedeker. How  
1058 abstract is syntax? Evidence from structural priming. *Cognition*,  
1059 193(December 2018):104045, 2019. ISSN 18737838. doi: 10.1016/j.  
1060 cognition.2019.104045. URL [https://doi.org/10.1016/j.cognition.](https://doi.org/10.1016/j.cognition.2019.104045)  
1061 2019.104045.

1062 **6. Appendix**

1063 **TIGERSearch queries**

1064 We defined the number of ambiguous prepositional phrases (PPs) as those  
1065 phrases that dominate a preposition and directly follow a noun:

1066 (1) [pos="NN"].#pp:[cat="PP"]& #pp > #prep:["APPR" | pos="APPRART"]

1067 We extracted frequency counts for all postnominal modifiers (noun-attached)  
1068 within the ambiguous PPs, excluding those cases where the PP is topicalized  
1069 (sentence-initial and therefore not ambiguous):

1070 (2) #noun:[pos="NN"].#pp:[cat="PP"]& #phrase > #noun & #pp >  
1071 #prep:[pos="APPR" | pos="APPRART"]& #n >MNR #pp & #phrase  
1072 > ? #x & [cat="VROOT"] !>? #x

1073 Similarly, we extracted frequency counts for all verb modifiers (verb-  
1074 attached) within the ambiguous PPs:

1075 (3) #noun:[pos="NN"].#pp:[cat="PP"]& #pp > #prep:[pos="APPR" |  
1076 pos="APPRART"] & #n > MO #pp

1077 **Stimulus Material - Verb condition**

Table 2: Stimulus Material - Verb condition

| Sentence                                                          | Attachment |
|-------------------------------------------------------------------|------------|
| Das Amt belohnt einen Arbeiter mit einer höheren Position.        | VA         |
| Das Amt empfiehlt einen Arbeiter mit einer höheren Position.      | NA         |
| Der Beirat besetzt die Ämter mit den besten Arbeitern.            | VA         |
| Der Beirat sucht die Ämter mit den besten Arbeitern.              | NA         |
| Der Camper mag die Suppe mit der frischen Petersilie.             | NA         |
| Der Camper würzt die Suppe mit der frischen Petersilie.           | VA         |
| Die Chefin meidet den Mitarbeiter mit der faltbaren Karte.        | NA         |
| Die Cousine erneuert die Reifen mit dem feinen Flickzeug.         | VA         |
| Die Cousine verschenkt die Reifen mit dem feinen Flickzeug.       | NA         |
| Die Diebin beneidet ihren Komplizen mit der einzigen Pistole.     | NA         |
| Die Diebin rettet ihren Komplizen mit der einzigen Pistole.       | VA         |
| Der Förster befördern das Holz mit der roten Markierung.          | NA         |
| Der Förster markiert das Holz mit der roten Markierung.           | VA         |
| Die Fotografen benötigen eine Kamera mit dem wertigen Objektiv.   | NA         |
| Die Fotografen erweitern eine Kamera mit dem wertigen Objektiv.   | VA         |
| Die Gärtnerin beschenkt die Dame mit den weißen Rosen.            | VA         |
| Die Gärtnerin kennt die Dame mit den weißen Rosen.                | NA         |
| Der Gast beschriftet die Serviette mit einer mobilen Handynummer. | VA         |
| Der Gast findet die Serviette mit einer mobilen Handynummer.      | NA         |
| Der Großvater backt die Brezel mit dem groben Salz.               | NA         |
| Continued on next page                                            |            |

**Table 2 – continued from previous page**

| Sentence                                                                | Attachment |
|-------------------------------------------------------------------------|------------|
| Der Großvater bestreut die Brezel mit dem groben Salz.                  | VA         |
| Der Ingenieur beschmiert die Kette mit dem klebrigen Öl.                | VA         |
| Der Ingenieur verpackt die Kette mit dem klebrigen Öl.                  | NA         |
| Die Investoren besetzen die Betriebe mit einigen fleißigen Tagelöhnern. | VA         |
| Die Investoren suchen die Betriebe mit einigen fleißigen Tagelöhnern.   | NA         |
| Der Junge beneidet seinen Bruder mit dem dicken Seil.                   | NA         |
| Der Junge rettet seinen Bruder mit dem dicken Seil.                     | VA         |
| Der Kellner füllt die Tasse mit dem heißen Kaffee.                      | VA         |
| Der Kellner hält die Tasse mit dem heißen Kaffee.                       | NA         |
| Der Koch mag den Salat mit den lokalen Kräutern.                        | NA         |
| Der Koch würzt den Salat mit den lokalen Kräutern.                      | VA         |
| Der Konditor backt den Kuchen mit den bunten Streuseln.                 | NA         |
| Der Konditor bestreut den Kuchen mit den bunten Streuseln.              | VA         |
| Der Küchenchef füllt den Topf mit der gestrigen Suppe.                  | VA         |
| Der Küchenchef hält den Topf mit der gestrigen Suppe.                   | NA         |
| Der Kunde benötigt einen Computer mit einer modernen Tastatur.          | NA         |
| Der Kunde erweitert einen Computer mit einer modernen Tastatur.         | VA         |
| Die Kundin bezahlt die Kellnerin mit den unhöflichen Manieren.          | NA         |
| Die Kundin verärgert die Kellnerin mit den unhöflichen Manieren.        | VA         |
| Die Landwirte sperren die Wiesen mit den stacheligen Zäunen.            | VA         |
| Die Landwirte umfahren die Wiesen mit den stacheligen Zäunen.           | NA         |
| Die Nichte meidet die Patentante mit der riesigen Torte.                | NA         |
| Continued on next page                                                  |            |



**Table 2 – continued from previous page**

| Sentence                                                                 | Attachment |
|--------------------------------------------------------------------------|------------|
| Die Partei überzeugt eine Untergruppe mit einigen fraglichen Argumenten. | VA         |
| Die Partei besitzt eine Untergruppe mit einigen fraglichen Argumenten.   | NA         |
| Die Pflegerin beschenkt eine Seniorin mit ganz viel Liebe.               | VA         |
| Die Pflegerin kennt eine Seniorin mit ganz viel Liebe.                   | NA         |
| Die Politikerin bezahlt den Taxifahrer mit der dreisten Art.             | NA         |
| Die Politikerin verärgert den Taxifahrer mit der dreisten Art.           | VA         |
| Der Polizist braucht seinen Kollegen mit dem anonymen Telefon.           | NA         |
| Der Polizist verständigt seinen Kollegen mit dem anonymen Telefon.       | VA         |
| Der Praktikant beschmiert das Brot mit der organischen Butter.           | VA         |
| Die Praktikant verpackt das Brot mit der organischen Butter.             | NA         |
| Der Prüfer sperrt die Zone mit dem rot-weißen Absperrband.               | VA         |
| Der Prüfer umfährt die Zone mit dem rot-weißen Absperrband.              | NA         |
| Die Reiterin belohnt ein Pferd mit einem neuen Sattel.                   | VA         |
| Die Reiterin empfiehlt ein Pferd mit einem neuen Sattel.                 | NA         |
| Die Schülerin schreibt die Klausur mit nur wenigen Fehlern.              | VA         |
| Die Schülerin zeigt die Klausur mit nur wenigen Fehlern.                 | NA         |
| Der Sekretär schreibt das Protokoll mit der schönen Handschrift.         | VA         |
| Der Sekretär zeigt das Protokoll mit der schönen Handschrift.            | NA         |
| Der Spion beschriftet das Notizbuch mit einer wertvollen Information.    | VA         |
| Der Spion findet das Notizbuch mit einer wertvollen Information.         | NA         |
| Der Staat beliefert die Haushalte mit einem robusten Stromnetz.          | VA         |
| Der Staat zählt die Haushalte mit einem robusten Stromnetz.              | NA         |
| Continued on next page                                                   |            |

**Table 2 – continued from previous page**

| Sentence                                                             | Attachment |
|----------------------------------------------------------------------|------------|
| Die Trainerin schlägt den Hund mit einem langen Stock.               | VA         |
| Die Trainerin sieht den Hund mit einem langen Stock.                 | NA         |
| Der Verbrecher besänftigt den Anwalt mit den cleveren Ausreden.      | VA         |
| Der Verbrecher bevorzugt den Anwalt mit den cleveren Ausreden.       | NA         |
| Der Verein überzeugt ein Komitee mit einer dynamischen Rhetorik.     | VA         |
| Der Verein besitzt ein Komitee mit einer dynamischen Rhetorik.       | NA         |
| Die Zentrale braucht das Flugzeug mit dem digitalen Funkgerät.       | NA         |
| Die Zentrale verständigt das Flugzeug mit dem digitalen Funkgerät.   | VA         |
| Die Züchterin schlägt das Tier mit der kurzen Leine.                 | VA         |
| Die Züchterin sieht das Tier mit der kurzen Leine.                   | NA         |
| Der Produzent beliefert die Fabriken mit den seltenen Teilen.        | VA         |
| Der Produzent zählt die Fabriken mit den seltenen Teilen.            | NA         |
| Der Unternehmer besänftigt den Geldanleger mit den klugen Sprüchen.  | VA         |
| Der Unternehmer bevorzugt den Geldanleger mit den klugen Sprüchen.   | NA         |
| Die Cousine erneuert den Raumduft mit einem handlichen Nachfüller.   | VA         |
| Die Cousine verschenkt den Raumduft mit einem handlichen Nachfüller. | NA         |
| Der Bote befördert die Kisten mit dem gelben Etikett.                | NA         |
| Der Bote markiert die Kisten mit dem gelben Etikett.                 | VA         |
| Die Chefin gratuliert dem Mitarbeiter mit der faltbaren Karte.       | VA         |
| Die Nichte gratuliert der Patentante mit der riesigen Torte.         | VA         |
| Der Maler begutachtet die Wand mit der frischen Farbe.               | NA         |
| Der Maler bemalt die Wand mit der frischen Farbe.                    | VA         |

Continued on next page

**Table 2 – continued from previous page**

| <b>Sentence</b>                                                    | <b>Attachment</b> |
|--------------------------------------------------------------------|-------------------|
| Der Schamane begutachtet die Maske mit der braunen Kreide.         | NA                |
| Der Schamane bemalt die Maske mit der braunen Kreide.              | VA                |
| Der Arzt entdeckt den Säugling mit einem flauschigen Teddy.        | NA                |
| Der Arzt ermuntert den Säugling mit einem flauschigen Teddy.       | VA                |
| Der Sanitäter entdeckt den Kranken mit einem kuscheligen Bären.    | NA                |
| Der Sanitäter ermuntert den Kranken mit einem kuscheligen Bären.   | VA                |
| Die Blinde ertastet das Wesen mit den zarten Fingern.              | VA                |
| Die Blinde verehrt das Wesen mit den zarten Fingern.               | NA                |
| Die Kaiserin ertastet das Geschöpf mit den feinen Händen.          | VA                |
| Die Kaiserin verehrt das Geschöpf mit den feinen Händen.           | NA                |
| Der Junggeselle erfreut die Angebetete mit einem hübschen Kleid.   | VA                |
| Der Junggeselle wählt die Angebetete mit einem hübschen Kleid.     | NA                |
| Der Kandidat erfreut die Kandidatin mit einem strahlenden Lächeln. | VA                |
| Der Kandidat wählt die Kandidatin mit einem strahlenden Lächeln.   | NA                |

1079 **Stimulus Material - Role condition**

Table 3: Stimulus Material - Role condition

| Sentence                                                      | Attachment |
|---------------------------------------------------------------|------------|
| Der Wärter streichelt den Elefant mit dem grauen Rüssel.      | NA         |
| Der Elefant streichelt den Wärter mit dem grauen Rüssel.      | VA         |
| Der Wanderer schubst den Bock mit dem gekrümmten Horn.        | NA         |
| Der Bock schubst den Wanderer mit dem gekrümmten Horn.        | VA         |
| Der Hirsch trifft den Krieger mit dem klobigen Gewehr.        | NA         |
| Der Krieger trifft den Hirsch mit dem klobigen Gewehr.        | VA         |
| Die Robbe bespritzt die Animateurin mit dem vollen Eimer.     | NA         |
| Die Animateurin bespritzt die Robbe mit dem vollen Eimer.     | VA         |
| Der Papagei ärgert den Pilger mit dem spitzen Schnabel.       | VA         |
| Der Pilger ärgert den Papagei mit dem spitzen Schnabel.       | NA         |
| Der Schüler kitzelt den Kater mit dem weißen Schnurrhaar.     | NA         |
| Der Kater kitzelt den Schüler mit dem weißen Schnurrhaar.     | VA         |
| Der Doktor begrüßt den Patient mit dem brandneuen Stethoskop. | VA         |
| Der Patient begrüßt den Doktor mit dem brandneuen Stethoskop. | NA         |
| Der Mieter erwartet den Klempner mit der dreckigen Rohrzange. | NA         |
| Der Klempner erwartet den Mieter mit der dreckigen Rohrzange. | VA         |
| Die Zahnfee überrascht die Tochter mit dem wackeligen Zahn.   | NA         |
| Die Tochter überrascht die Zahnfee mit dem wackeligen Zahn.   | VA         |
| Das Maskottchen umarmt das Mädchen mit den pelzigen Armen.    | VA         |
| Das Mädchen umarmt das Maskottchen mit den pelzigen Armen.    | NA         |
| Continued on next page                                        |            |

**Table 3 – continued from previous page**

| Sentence                                                            | Attachment |
|---------------------------------------------------------------------|------------|
| Der Sänger winkt dem Fan mit der akustischen Gitarre.               | VA         |
| Der Fan winkt dem Sänger mit der akustischen Gitarre.               | NA         |
| Der Dirigent folgt dem Musiker mit der lieblichen Geige.            | NA         |
| Der Musiker folgt dem Dirigent mit der lieblichen Geige.            | VA         |
| Die Betreuer geleiten die Senioren mit den klapprigen Rollatoren.   | NA         |
| Die Senioren geleiten die Betreuer mit den klapprigen Rollatoren.   | VA         |
| Der Sanitäter holt den Urlauber mit der faltbaren Trage.            | VA         |
| Der Urlauber holt den Sanitäter mit der faltbaren Trage.            | NA         |
| Der Reiter überholt den Biker mit dem schweren Motorrad.            | NA         |
| Der Biker überholt den Reiter mit dem schweren Motorrad.            | VA         |
| Die Mütter bedrängen die Obsthändler mit den sperrigen Kinderwägen. | VA         |
| Die Obsthändler bedrängen die Mütter mit den sperrigen Kinderwägen. | NA         |
| Das Kleinkind berührt das Pony mit der weichen Schnauze.            | NA         |
| Das Pony berührt das Kleinkind mit der weichen Schnauze.            | VA         |
| Der Kaiser erheitert den Hofnarr mit der bunten Perücke.            | NA         |
| Der Hofnarr erheitert den Kaiser mit der bunten Perücke.            | VA         |
| Die Erzählerin lauscht der Greisin mit dem piepsenden Hörgerät.     | NA         |
| Die Greisin lauscht der Erzählerin mit dem piepsenden Hörgerät.     | VA         |
| Der Milliardär begegnet dem Bauarbeiter mit dem teuren Cabrio.      | VA         |
| Der Bauarbeiter begegnet dem Milliardär mit dem teuren Cabrio.      | NA         |
| Der Fußballer nervt den Schiri mit der schwarzen Pfeife.            | NA         |
| Der Schiri nervt den Fußballer mit der schwarzen Pfeife.            | VA         |
| Continued on next page                                              |            |

**Table 3 – continued from previous page**

| Sentence                                                         | Attachment |
|------------------------------------------------------------------|------------|
| Der Adler verfolgt den Jäger mit der rostigen Flinte.            | NA         |
| Der Jäger verfolgt den Adler mit der rostigen Flinte.            | VA         |
| Der Kassierer erreicht den Käufer mit dem vollen Wagen.          | NA         |
| Der Käufer erreicht den Kassierer mit dem vollen Wagen.          | VA         |
| Der Specht lockt den Käfer mit dem glänzenden Panzer.            | NA         |
| Der Käfer lockt den Specht mit dem glänzenden Panzer.            | VA         |
| Die Soldaten bekriegen die Indianer mit den vergifteten Pfeilen. | NA         |
| Die Indianer bekriegen die Soldaten mit den vergifteten Pfeilen. | VA         |
| Der Büffel bekämpft den Tiger mit den breiten Tatzen.            | NA         |
| Der Tiger bekämpft den Büffel mit den breiten Tatzen.            | VA         |
| Der Hausmeister erschreckt den Greis mit dem klappernden Gebiss. | NA         |
| Der Greis erschreckt den Hausmeister mit dem klappernden Gebiss. | VA         |
| Der Kurier ohrfeigt den Butler mit dem silbernen Tablett.        | NA         |
| Der Butler ohrfeigt den Kurier mit dem silbernen Tablett.        | VA         |
| Das Kind verängstigt das Insekt mit dem giftigen Stachel.        | NA         |
| Das Insekt verängstigt das Kind mit dem giftigen Stachel.        | VA         |
| Die Kuh bedroht die Wilde mit der brennenden Fackel.             | NA         |
| Die Wilde bedroht die Kuh mit der brennenden Fackel.             | VA         |
| Das Rind attackiert das Publikum mit den spitzen Hörnern.        | VA         |
| Das Publikum attackiert das Rind mit den spitzen Hörnern.        | NA         |
| Das Einhorn beschützt das Fräulein mit dem leuchtenden Horn.     | VA         |
| Das Fräulein beschützt das Einhorn mit dem leuchtenden Horn.     | NA         |
| Continued on next page                                           |            |

**Table 3 – continued from previous page**

| Sentence                                                              | Attachment |
|-----------------------------------------------------------------------|------------|
| Der Radler behindert den Bauer mit dem dreckigen Trecker.             | NA         |
| Der Bauer behindert den Radler mit dem dreckigen Trecker.             | VA         |
| Der Chor animiert den Pensionär mit seinem alten Krückstock.          | NA         |
| Der Pensionär animiert den Chor mit seinem alten Krückstock.          | VA         |
| Der Sänger begleitet den Violinist mit seiner kostbaren Violine.      | NA         |
| Der Violinist begleitet den Sänger mit seiner kostbaren Violine.      | VA         |
| Der Knecht empfängt den König mit seinem prächtigen Zepter.           | NA         |
| Der König empfängt den Knecht mit seinem prächtigen Zepter.           | VA         |
| Der Ninja schützt den Meister mit den uralten Weisheiten.             | NA         |
| Der Meister schützt den Ninja mit den uralten Weisheiten.             | VA         |
| Die Schwangere verblüfft die Hebamme mit ihrer jahrelangen Erfahrung. | NA         |
| Die Hebamme verblüfft die Schwangere mit ihrer jahrelangen Erfahrung. | VA         |
| Der Fuchs verletzt den Igel mit den kleinen Stacheln.                 | NA         |
| Der Igel verletzt den Fuchs mit den kleinen Stacheln.                 | VA         |
| Das Volk vertreibt das Militär mit den grässlichen Waffen.            | NA         |
| Das Militär vertreibt das Volk mit den grässlichen Waffen.            | VA         |
| Die Beute reizt die Krake mit den flinken Tentakeln.                  | NA         |
| Die Krake reizt die Beute mit den flinken Tentakeln.                  | VA         |
| Der Elch rammt den Wolf mit seinem enormen Geweih.                    | VA         |
| Der Wolf rammt den Elch mit seinem enormen Geweih.                    | NA         |
| Der Samurai verwundet den Alligator mit dem antiken Schwert.          | VA         |
| Der Alligator verwundet den Samurai mit dem antiken Schwert.          | NA         |
| Continued on next page                                                |            |

**Table 3 – continued from previous page**

| <b>Sentence</b>                                                     | <b>Attachment</b> |
|---------------------------------------------------------------------|-------------------|
| Die Muschel bezwingt die Möwe mit ihrer harten Schale.              | VA                |
| Die Möwe bezwingt die Muschel mit ihrer harten Schale.              | NA                |
| Die Wühlmaus befühlt die Schnecke mit den wendigen Fühlern.         | NA                |
| Die Schnecke befühlt die Wühlmaus mit den wendigen Fühlern.         | VA                |
| Die Bäuerin liebkost die Miezekatte mit den rosa Pfoten.            | NA                |
| Die Miezekatte liebkost die Bäuerin mit den rosa Pfoten.            | VA                |
| Der Badegast schikaniert den Delphin mit den kräftigen Flossen.     | NA                |
| Der Delphin schikaniert den Badegast mit den kräftigen Flossen.     | VA                |
| Der Eigentümer erzürnt den Mechaniker mit dem schmutzigen Werkzeug. | NA                |
| Der Mechaniker erzürnt den Eigentümer mit dem schmutzigen Werkzeug. | VA                |
| Die Mücke quält die Urlauberin mit dem aggressiven Mückenspray.     | NA                |
| Die Urlauberin quält die Mücke mit dem aggressiven Mückenspray.     | VA                |
| Die Fliege plagt die Hündin mit dem wedelnden Schwanz.              | NA                |
| Die Hündin plagt die Fliege mit dem wedelnden Schwanz.              | VA                |
